# Supplementary material for: The scoring of poses in protein-protein docking: current capabilities and future directions
Source: PubMed Central journal article supplement (PMC3850738; doi:10.1186/1471-2105-14-286), 2013-10-01
Supplement: 1471-2105-14-286-S1.pdf [file 1471-2105-14-286-S1.pdf]

# Supplementary Material

**Supplementary Figure 1.** The success rates for the highest performing scoring functions. The number of complexes for which an acceptable or better solution could be found in the top 1, top 10 and top 100 solutions was calculated for each scoring function, and the best 40 scoring functions for each measure were selected. Acceptable quality solutions are shown in yellow, medium quality solutions in orange, and high quality solutions in red for the three measures (top 1 left, top 10 middle, top 100 right). The complexes are ordered by top 1 success rate.

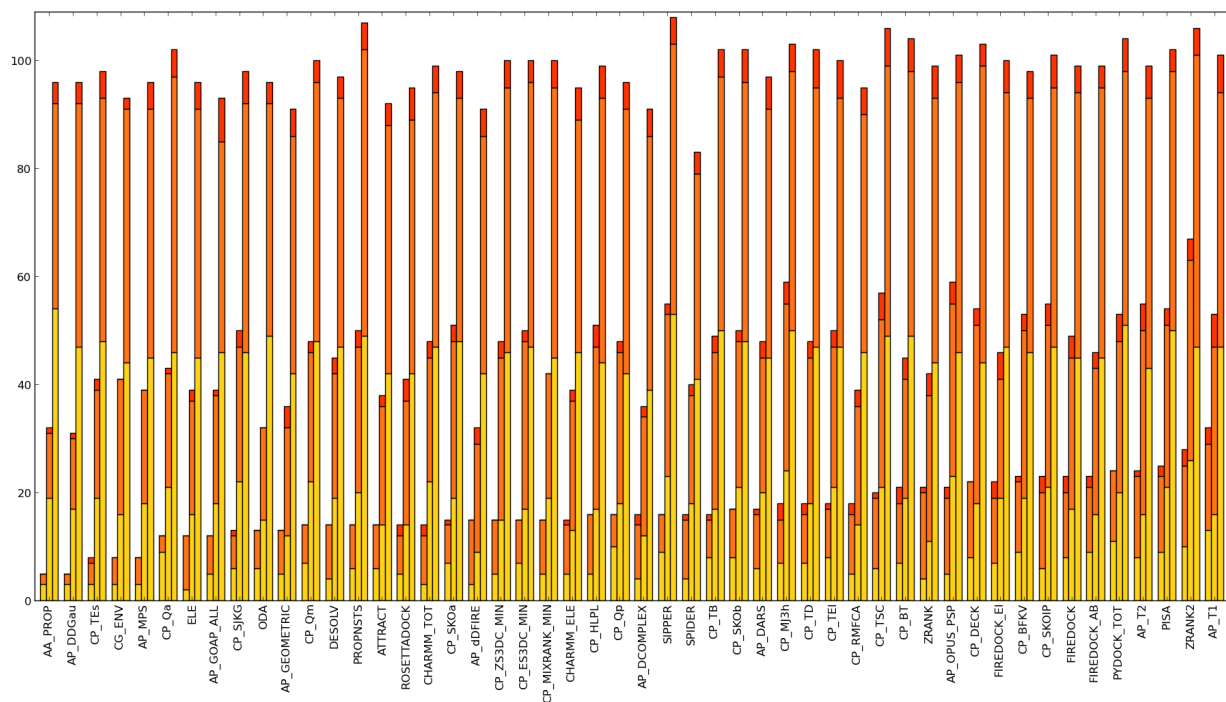

**Supplementary Figure 2.** The success rates for the highest performing scoring functions. The number of complexes for which an acceptable or better solution could be found in the top 1, top 10 and top 100 solutions was calculated for each scoring function, and the best 40 scoring functions for each measure were selected. Acceptable quality solutions are shown in yellow, medium quality solutions in orange, and high quality solutions in red for the three measures (top 1 left, top 10 middle, top 100 right). The complexes are ordered by top 100 success rate.

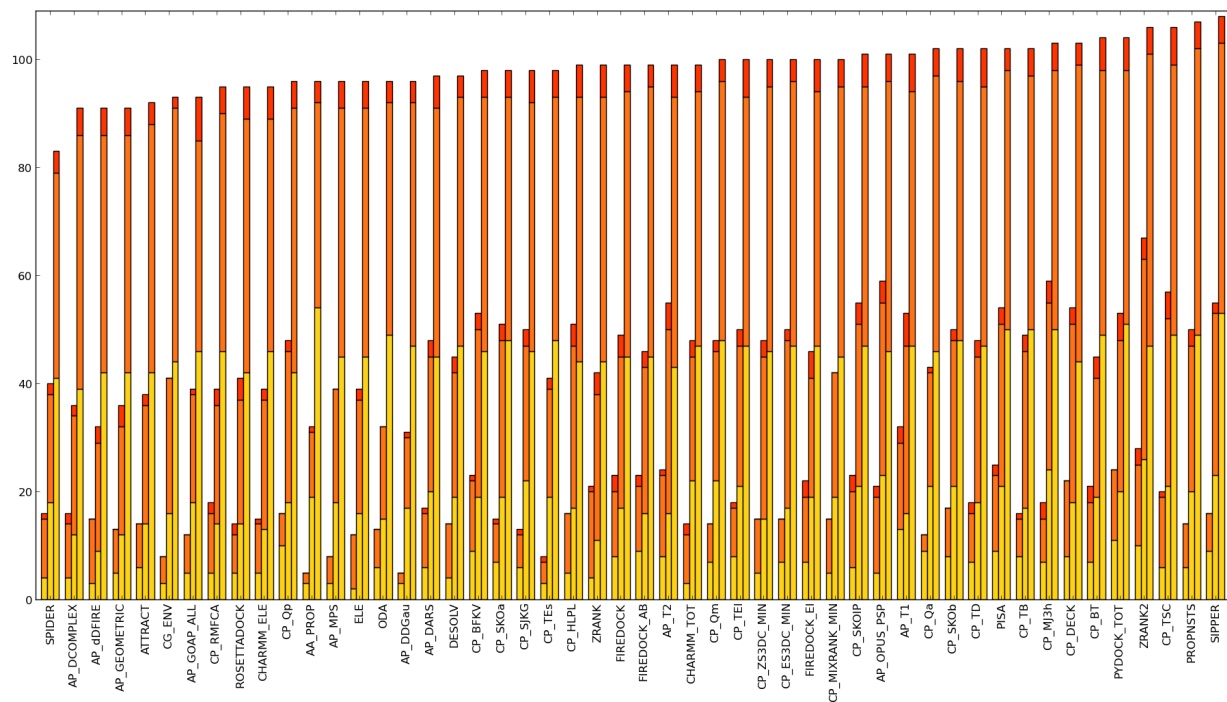

**Supplementary Figure 3.** The success rates for the highest performing scoring functions applied to the rigid complexes. The number of complexes for which an acceptable or better solution could be found in the top 1, top 10 and top 100 solutions was calculated for each scoring function, and the best 40 scoring functions for each measure were selected. Acceptable quality solutions are shown in yellow, medium quality solutions in orange, and high quality solutions in red for the three measures (top 1 left, top 10 middle, top 100 right). The complexes are ordered by top 1 success rate.

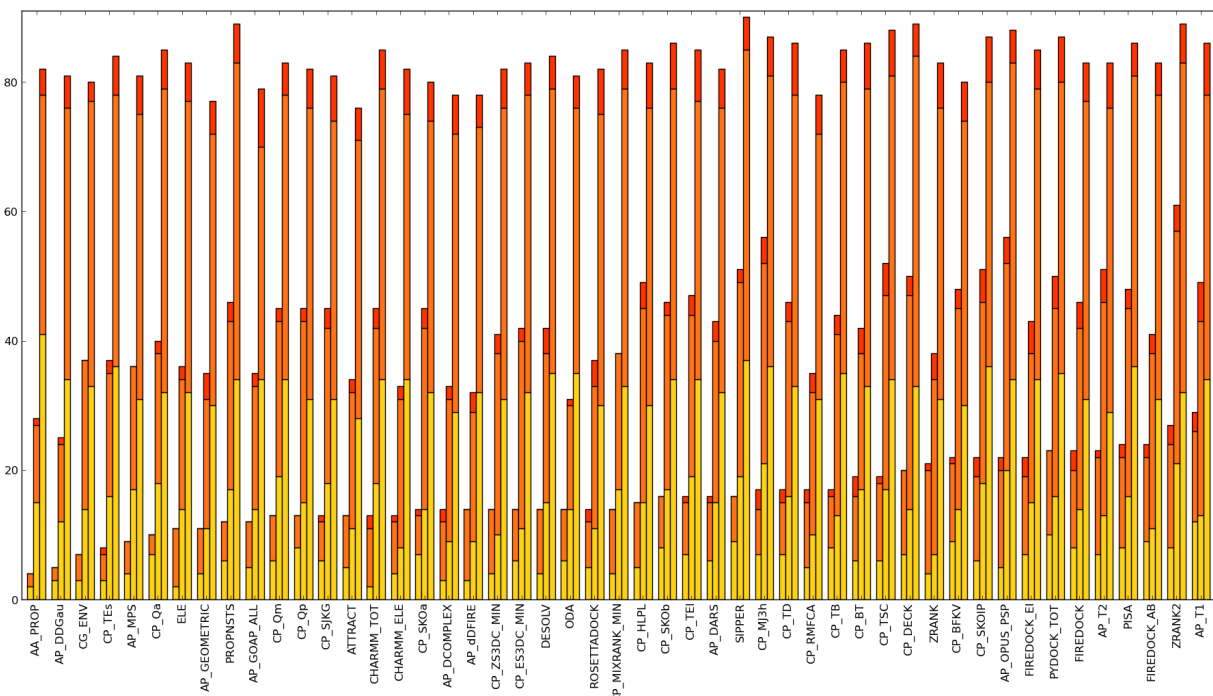

**Supplementary Figure 4.** The success rates for the highest performing scoring functions applied to the rigid complexes. The number of complexes for which an acceptable or better solution could be found in the top 1, top 10 and top 100 solutions was calculated for each scoring function, and the best 40 scoring functions for each measure were selected. Acceptable quality solutions are shown in yellow, medium quality solutions in orange, and high quality solutions in red for the three measures (top 1 left, top 10 middle, top 100 right). The complexes are ordered by top 10 success rate.

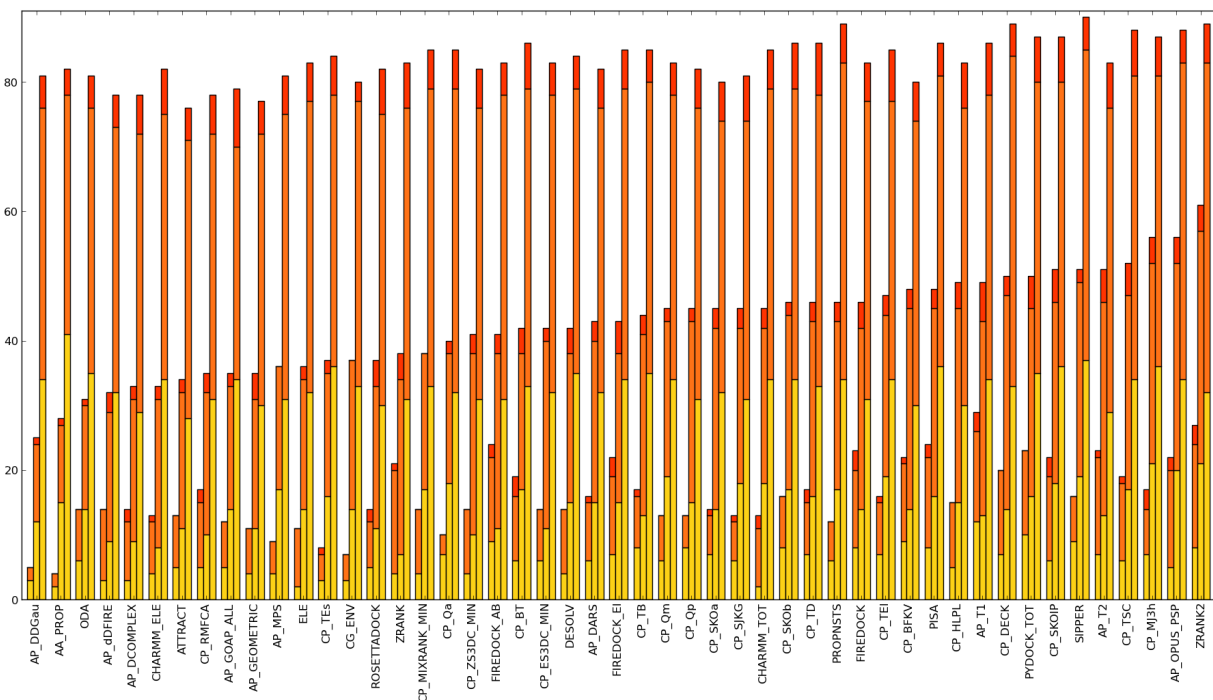

**Supplementary Figure 5.** The success rates for the highest performing scoring functions applied to the rigid complexes. The number of complexes for which an acceptable or better solution could be found in the top 1, top 10 and top 100 solutions was calculated for each scoring function, and the best 40 scoring functions for each measure were selected. Acceptable quality solutions are shown in yellow, medium quality solutions in orange, and high quality solutions in red for the three measures (top 1 left, top 10 middle, top 100 right). The complexes are ordered by top 100 success rate.

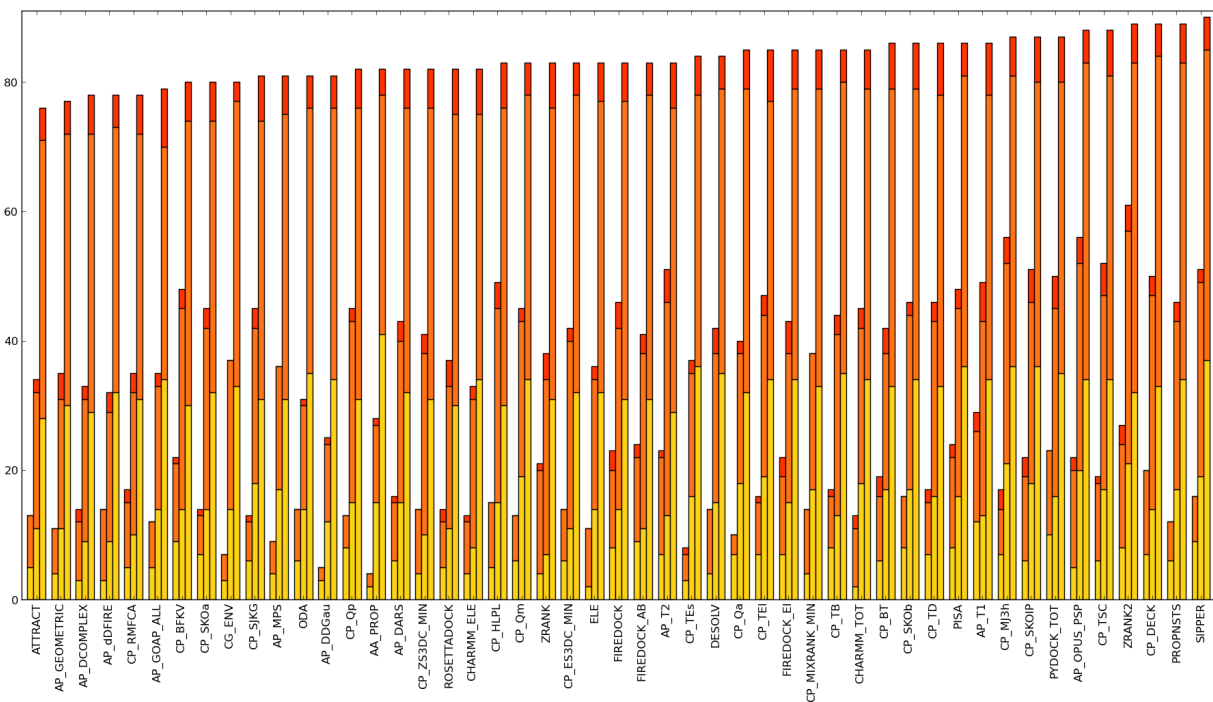



**Supplementary Figure 7.** The success rates for the highest performing scoring functions applied to the flexible complexes. The number of complexes for which an acceptable or better solution could be found in the top 1, top 10 and top 100 solutions was calculated for each scoring function, and the best 40 scoring functions for each measure were selected. Acceptable quality solutions are shown in yellow, medium quality solutions in orange, and high quality solutions in red for the three measures (top 1 left, top 10 middle, top 100 right). The complexes are ordered by top 10 success rate.

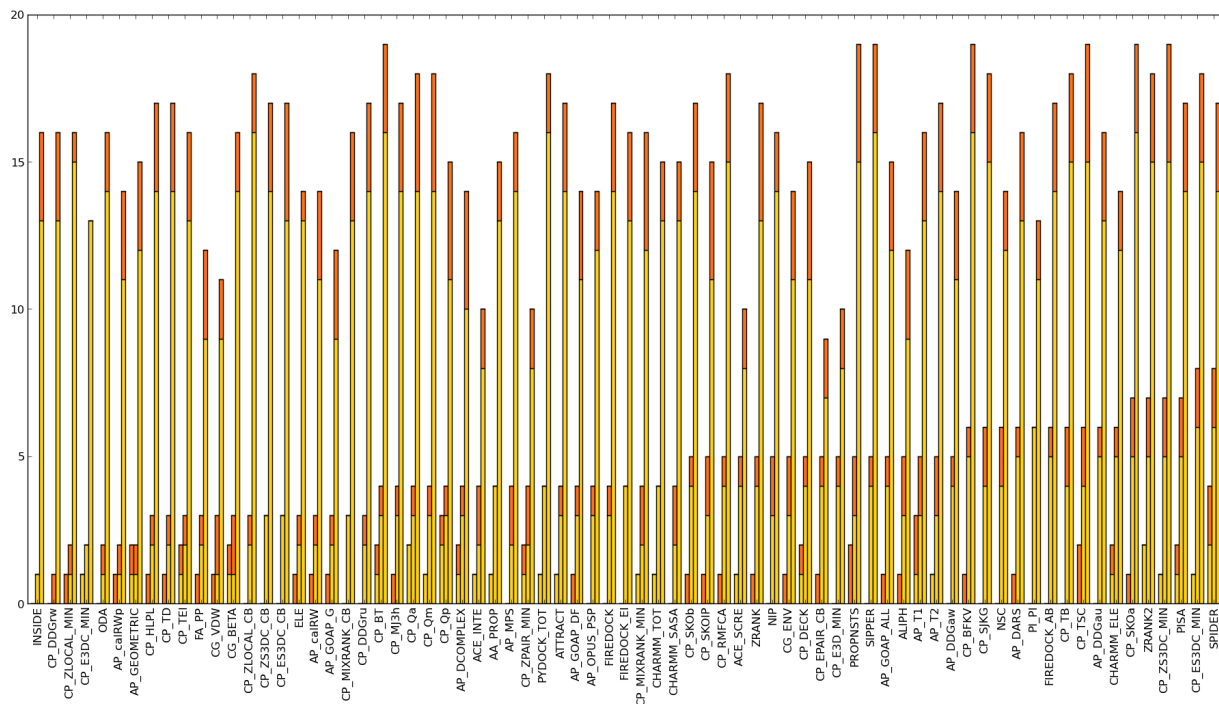

**Supplementary Figure 8.** The success rates for the highest performing scoring functions applied to the flexible complexes. The number of complexes for which an acceptable or better solution could be found in the top 1, top 10 and top 100 solutions was calculated for each scoring function, and the best 40 scoring functions for each measure were selected. Acceptable quality solutions are shown in yellow, medium quality solutions in orange, and high quality solutions in red for the three measures (top 1 left, top 10 middle, top 100 right). The complexes are ordered by top 100 success rate.

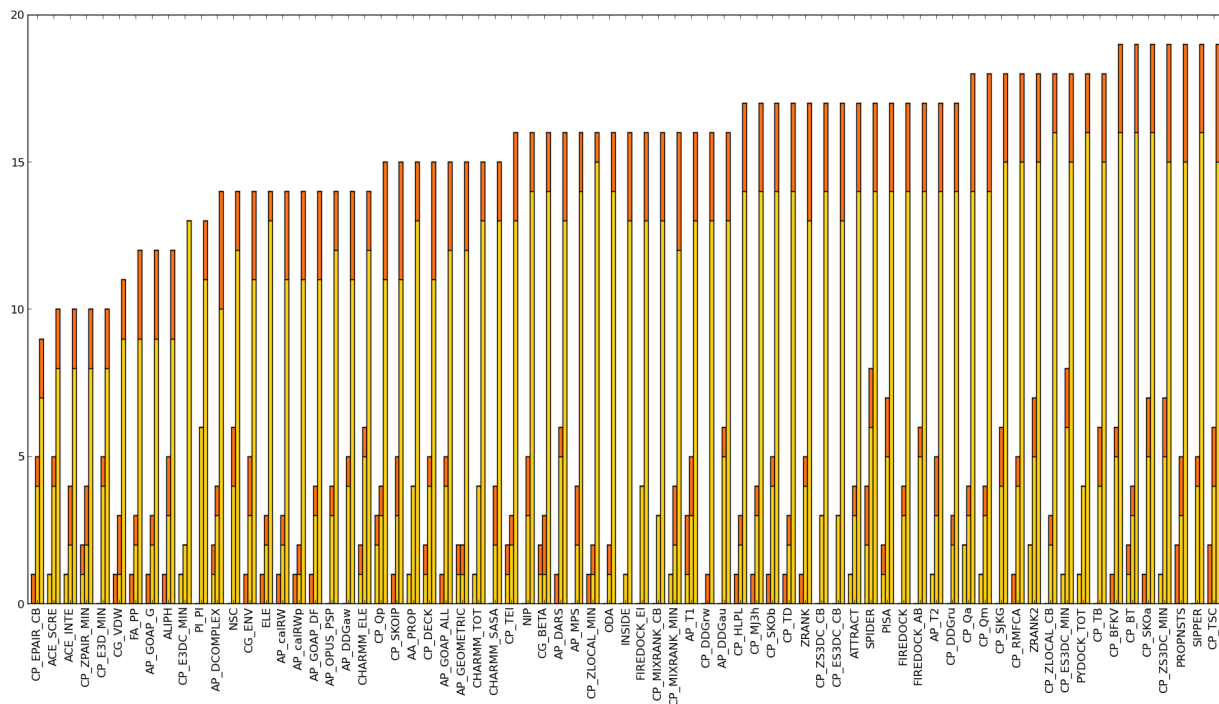



**Supplementary Table 1.** The number of complexes for which acceptable quality or better, medium quality or better, and high quality solutions, were found within the top 1, top 10 and top 100, for each scoring function evaluated.

| Method       | Acceptable |        |         | Medium |        |         | High  |        |         |
|--------------|------------|--------|---------|--------|--------|---------|-------|--------|---------|
|              | Top 1      | Top 10 | Top 100 | Top 1  | Top 10 | Top 100 | Top 1 | Top 10 | Top 100 |
| CP_BFKV      | 23         | 54     | 99      | 14     | 35     | 53      | 1     | 3      | 6       |
| CP_BL        | 4          | 20     | 80      | 3      | 11     | 42      | 0     | 0      | 4       |
| CP_BT        | 21         | 46     | 105     | 14     | 26     | 56      | 3     | 4      | 7       |
| CP_GKS       | 2          | 8      | 75      | 2      | 4      | 40      | 0     | 0      | 4       |
| CP_HLPL      | 16         | 52     | 100     | 11     | 35     | 56      | 0     | 4      | 7       |
| CP_MJPL      | 5          | 20     | 81      | 3      | 17     | 44      | 0     | 2      | 4       |
| CP_MJ3h      | 18         | 60     | 104     | 11     | 36     | 54      | 3     | 4      | 6       |
| CP_MJ2h      | 11         | 35     | 92      | 6      | 24     | 45      | 0     | 4      | 4       |
| CP_MJ1       | 1          | 16     | 69      | 0      | 4      | 33      | 0     | 0      | 4       |
| CP_MJ2       | 3          | 16     | 80      | 2      | 7      | 40      | 0     | 1      | 4       |
| CP_MSBM      | 3          | 19     | 78      | 2      | 10     | 39      | 0     | 0      | 3       |
| CP_MS        | 4          | 23     | 81      | 3      | 8      | 44      | 0     | 1      | 5       |
| CP_Qa        | 12         | 44     | 103     | 3      | 23     | 57      | 0     | 2      | 6       |
| CP_Qm        | 14         | 49     | 101     | 7      | 27     | 53      | 0     | 2      | 5       |
| CP_Qp        | 16         | 49     | 97      | 6      | 31     | 55      | 0     | 2      | 6       |
| CP_RO        | 5          | 29     | 90      | 2      | 15     | 44      | 1     | 2      | 5       |
| CP_SKOb      | 17         | 51     | 103     | 9      | 30     | 55      | 0     | 2      | 7       |
| CP_SKOa      | 15         | 52     | 99      | 8      | 33     | 51      | 1     | 3      | 6       |
| CP_SJKG      | 13         | 51     | 99      | 7      | 29     | 53      | 1     | 3      | 7       |
| CP_TD        | 18         | 49     | 103     | 11     | 31     | 56      | 2     | 3      | 8       |
| CP_TEl       | 18         | 50     | 101     | 10     | 29     | 54      | 1     | 3      | 8       |
| CP_TEs       | 8          | 41     | 99      | 5      | 22     | 51      | 1     | 2      | 6       |
| CP_TS        | 7          | 29     | 82      | 3      | 19     | 45      | 0     | 1      | 5       |
| CP_VD        | 7          | 37     | 93      | 5      | 25     | 50      | 0     | 2      | 5       |
| CP_SKOIP     | 23         | 56     | 102     | 17     | 35     | 55      | 3     | 5      | 7       |
| AP_DCOMPLEX  | 16         | 37     | 92      | 12     | 25     | 53      | 2     | 2      | 6       |
| AP_dDFIRE    | 15         | 33     | 92      | 12     | 24     | 50      | 0     | 3      | 5       |
| AP_DFIRE2    | 10         | 27     | 92      | 7      | 21     | 47      | 0     | 3      | 5       |
| CP_RMFCEN1   | 10         | 32     | 93      | 5      | 22     | 49      | 1     | 3      | 4       |
| CP_RMFCEN2   | 9          | 33     | 91      | 5      | 21     | 50      | 0     | 3      | 5       |
| CP_RMFCA     | 18         | 40     | 96      | 13     | 26     | 50      | 2     | 3      | 6       |
| AP_DOPE      | 7          | 19     | 83      | 6      | 9      | 44      | 0     | 0      | 7       |
| AP_DOPE_HR   | 7          | 24     | 89      | 5      | 15     | 44      | 0     | 0      | 5       |
| ZRANK        | 22         | 43     | 100     | 18     | 32     | 56      | 1     | 4      | 7       |
| ZRANK2       | 29         | 68     | 107     | 19     | 42     | 60      | 3     | 4      | 6       |
| ROT_S        | 4          | 18     | 67      | 1      | 9      | 32      | 0     | 0      | 2       |
| TRANS_S      | 4          | 19     | 81      | 3      | 9      | 44      | 1     | 1      | 6       |
| NIP          | 3          | 28     | 76      | 1      | 12     | 39      | 0     | 0      | 3       |
| NSC          | 9          | 37     | 85      | 5      | 18     | 39      | 0     | 0      | 3       |
| FA_ATR       | 3          | 29     | 82      | 2      | 19     | 44      | 0     | 2      | 4       |
| FA_REP       | 4          | 19     | 87      | 2      | 10     | 45      | 0     | 0      | 4       |
| LK_SOLV      | 4          | 19     | 75      | 1      | 6      | 30      | 0     | 1      | 4       |
| FA_PP        | 4          | 15     | 86      | 2      | 8      | 48      | 0     | 0      | 4       |
| CG_VDW       | 2          | 25     | 82      | 1      | 14     | 45      | 0     | 1      | 5       |
| CG_PP        | 1          | 14     | 72      | 1      | 5      | 42      | 0     | 0      | 6       |
| CG_ENV       | 8          | 42     | 94      | 5      | 25     | 50      | 0     | 0      | 3       |
| CG_BETA      | 2          | 16     | 77      | 1      | 10     | 35      | 0     | 0      | 2       |
| HBOND2       | 5          | 23     | 79      | 3      | 15     | 44      | 1     | 3      | 6       |
| ROSETTA      | 6          | 17     | 84      | 2      | 6      | 42      | 0     | 0      | 6       |
| AA_PROP      | 5          | 32     | 97      | 2      | 13     | 43      | 0     | 1      | 4       |
| AP_DARS      | 17         | 49     | 98      | 11     | 29     | 53      | 1     | 3      | 6       |
| AP_URS       | 8          | 25     | 84      | 8      | 18     | 43      | 1     | 2      | 5       |
| AP_MPS       | 9          | 40     | 97      | 5      | 21     | 52      | 0     | 0      | 6       |
| AP_WENG      | 3          | 14     | 81      | 2      | 5      | 39      | 1     | 1      | 6       |
| CP_DECK      | 22         | 55     | 104     | 14     | 37     | 60      | 0     | 3      | 5       |
| CP_ZPAIR_CB  | 1          | 10     | 63      | 1      | 5      | 29      | 0     | 1      | 5       |
| CP_ZLOCAL_CB | 2          | 15     | 81      | 1      | 8      | 39      | 0     | 0      | 3       |
| CP_ZS3DC_CB  | 4          | 22     | 92      | 3      | 12     | 48      | 0     | 1      | 5       |
| CP_Z3DC_CB   | 0          | 7      | 58      | 0      | 2      | 27      | 0     | 0      | 3       |
| CP_EPAIR_CB  | 4          | 16     | 75      | 3      | 6      | 37      | 1     | 1      | 4       |
| CP_ELOCAL_CB | 4          | 21     | 71      | 2      | 15     | 34      | 0     | 0      | 3       |
| CP_ES3DC_CB  | 6          | 21     | 92      | 3      | 12     | 45      | 0     | 1      | 3       |
| CP_E3DC_CB   | 1          | 8      | 59      | 1      | 4      | 25      | 0     | 0      | 1       |

Table continued on next page

Table continued from previous page

| Method         | Acceptable |        |         | Medium |        |         | High  |        |         |
|----------------|------------|--------|---------|--------|--------|---------|-------|--------|---------|
|                | Top 1      | Top 10 | Top 100 | Top 1  | Top 10 | Top 100 | Top 1 | Top 10 | Top 100 |
| CP_E3D_CB      | 4          | 21     | 69      | 2      | 12     | 35      | 0     | 0      | 4       |
| CP_ZPAIR_MIN   | 3          | 23     | 81      | 1      | 10     | 44      | 0     | 1      | 6       |
| CP_ZLOCAL_MIN  | 1          | 13     | 74      | 1      | 7      | 35      | 0     | 0      | 2       |
| CP_ZS3DC_MIN   | 15         | 48     | 101     | 10     | 33     | 55      | 0     | 3      | 6       |
| CP_Z3DC_MIN    | 0          | 13     | 72      | 0      | 3      | 27      | 0     | 1      | 1       |
| CP_EPAIR_MIN   | 3          | 25     | 80      | 2      | 10     | 41      | 0     | 2      | 6       |
| CP_ELOCAL_MIN  | 6          | 24     | 75      | 4      | 11     | 39      | 0     | 0      | 3       |
| CP_ES3DC_MIN   | 15         | 50     | 101     | 8      | 33     | 54      | 0     | 2      | 5       |
| CP_E3DC_MIN    | 4          | 18     | 76      | 1      | 7      | 35      | 0     | 0      | 1       |
| CP_E3D_MIN     | 7          | 28     | 77      | 5      | 14     | 43      | 0     | 0      | 5       |
| ELE            | 12         | 39     | 97      | 10     | 23     | 52      | 0     | 2      | 6       |
| DESOLV         | 14         | 46     | 98      | 10     | 27     | 51      | 0     | 4      | 5       |
| VDW            | 6          | 26     | 81      | 4      | 18     | 42      | 0     | 1      | 4       |
| PYDOCK_TOT     | 24         | 54     | 105     | 13     | 34     | 54      | 0     | 5      | 7       |
| ODA            | 14         | 33     | 97      | 8      | 18     | 48      | 0     | 1      | 5       |
| PROPNSTS       | 14         | 51     | 108     | 8      | 31     | 59      | 0     | 3      | 6       |
| SIPPER         | 16         | 56     | 109     | 7      | 33     | 56      | 0     | 2      | 5       |
| ATTRACT        | 14         | 38     | 93      | 8      | 24     | 51      | 0     | 2      | 5       |
| SPIDER         | 16         | 41     | 84      | 12     | 22     | 43      | 1     | 2      | 5       |
| PISA           | 26         | 55     | 103     | 17     | 34     | 53      | 2     | 3      | 5       |
| ROSETTADOCK    | 14         | 41     | 96      | 9      | 27     | 54      | 2     | 4      | 7       |
| AP_calRW       | 9          | 29     | 89      | 7      | 22     | 47      | 0     | 3      | 5       |
| AP_calRWp      | 10         | 29     | 90      | 7      | 22     | 47      | 0     | 3      | 5       |
| AP_GOAP_ALL    | 13         | 40     | 94      | 8      | 22     | 48      | 0     | 2      | 9       |
| AP_GOAP_DF     | 9          | 31     | 90      | 7      | 22     | 47      | 0     | 2      | 5       |
| AP_GOAP_G      | 8          | 25     | 84      | 5      | 13     | 46      | 0     | 2      | 8       |
| AP_ACE         | 4          | 34     | 81      | 3      | 18     | 44      | 0     | 4      | 7       |
| INSIDE         | 9          | 26     | 92      | 6      | 17     | 45      | 1     | 1      | 6       |
| HBOND          | 7          | 23     | 80      | 4      | 16     | 47      | 1     | 2      | 5       |
| PLPI           | 6          | 27     | 92      | 3      | 13     | 53      | 0     | 0      | 4       |
| CAT_PI         | 6          | 21     | 90      | 2      | 9      | 48      | 0     | 1      | 8       |
| ALIPH          | 9          | 32     | 82      | 7      | 22     | 45      | 2     | 3      | 4       |
| AP_OPUS_PSP    | 22         | 60     | 102     | 17     | 37     | 56      | 2     | 4      | 5       |
| AP_GEOMETRIC   | 13         | 37     | 92      | 8      | 25     | 50      | 0     | 4      | 5       |
| FIREDOCK       | 23         | 50     | 100     | 15     | 33     | 55      | 3     | 4      | 6       |
| FIREDOCK_AB    | 24         | 47     | 100     | 15     | 31     | 55      | 2     | 3      | 5       |
| FIREDOCK_EI    | 22         | 47     | 101     | 15     | 28     | 54      | 3     | 5      | 6       |
| CP_MIXRANK_CB  | 4          | 18     | 85      | 3      | 8      | 40      | 0     | 1      | 4       |
| CP_MIXRANK_MIN | 15         | 42     | 101     | 10     | 23     | 56      | 0     | 0      | 6       |
| CP_TB          | 17         | 50     | 103     | 9      | 33     | 53      | 1     | 3      | 5       |
| CP_TSC         | 21         | 58     | 107     | 15     | 37     | 58      | 1     | 5      | 7       |
| AP_T1          | 32         | 54     | 102     | 19     | 38     | 55      | 3     | 6      | 8       |
| AP_T2          | 24         | 56     | 100     | 16     | 40     | 57      | 1     | 5      | 7       |
| NHB            | 4          | 24     | 91      | 3      | 15     | 49      | 0     | 3      | 7       |
| CP_DDGrU       | 7          | 29     | 93      | 4      | 15     | 48      | 0     | 0      | 7       |
| CP_DDGrw       | 5          | 30     | 91      | 3      | 21     | 46      | 0     | 1      | 4       |
| AP_DDgau       | 5          | 31     | 97      | 2      | 14     | 50      | 0     | 1      | 5       |
| AP_DDgaw       | 10         | 37     | 94      | 9      | 22     | 54      | 1     | 3      | 7       |
| CHARMM_TOT     | 14         | 49     | 100     | 11     | 27     | 53      | 2     | 3      | 6       |
| CHARMM_ELE     | 15         | 39     | 96      | 10     | 26     | 50      | 1     | 2      | 7       |
| CHARMM_SASA    | 2          | 27     | 78      | 2      | 14     | 39      | 0     | 1      | 3       |
| CHARMM_VDW     | 6          | 23     | 77      | 4      | 14     | 41      | 0     | 0      | 3       |

**Supplementary Table 2.** Conditional probabilities of finding an acceptable solution within the top 10 or top 100, given the existence of an acceptable or better solution, or a medium or better solution. Probabilities are shown as percentages.

| Method         | Top 10     |        |            | Top 100    |        |            |
|----------------|------------|--------|------------|------------|--------|------------|
|                | Acceptable | Medium | Difference | Acceptable | Medium | Difference |
| CP_MJ1         | 13.01      | 5.41   | -7.21      | 56.10      | 44.59  | -6.09      |
| CP_MS          | 18.70      | 10.81  | -6.79      | 65.85      | 59.46  | 1.20       |
| LK_SOLV        | 15.45      | 8.11   | -6.58      | 60.98      | 40.54  | -15.94     |
| AA_PROP        | 26.02      | 17.57  | -6.48      | 78.86      | 58.11  | -13.95     |
| CP_Z3DC_MIN    | 10.57      | 4.05   | -6.26      | 58.54      | 36.49  | -18.16     |
| CP_EPAIR_MIN   | 20.33      | 13.51  | -5.31      | 65.04      | 55.41  | -2.72      |
| ROSETTA        | 13.82      | 8.11   | -4.88      | 68.29      | 56.76  | -4.52      |
| NIP            | 22.76      | 16.22  | -4.68      | 61.79      | 52.70  | -2.50      |
| CP_E3DC_MIN    | 14.63      | 9.46   | -4.14      | 61.79      | 47.30  | -8.85      |
| AP_DDGu        | 25.20      | 18.92  | -4.05      | 78.86      | 67.57  | -2.84      |
| CP_EPAIR_CB    | 13.01      | 8.11   | -4.04      | 60.98      | 50.00  | -4.83      |
| AP_WENG        | 11.38      | 6.76   | -3.93      | 65.85      | 52.70  | -6.74      |
| CG_PP          | 11.38      | 6.76   | -3.93      | 58.54      | 56.76  | 5.65       |
| CP_ZPAIR_MIN   | 18.70      | 13.51  | -3.62      | 65.85      | 59.46  | 1.20       |
| CAT_PI         | 17.07      | 12.16  | -3.51      | 73.17      | 64.86  | -0.08      |
| CP_ELOCAL_MIN  | 19.51      | 14.86  | -2.88      | 60.98      | 52.70  | -1.65      |
| NSC            | 30.08      | 24.32  | -2.78      | 69.11      | 52.70  | -10.13     |
| CP_Z3DC_CB     | 5.69       | 2.70   | -2.76      | 47.15      | 36.49  | -6.30      |
| CP_MIXRANK_CB  | 14.63      | 10.81  | -2.56      | 69.11      | 54.05  | -8.54      |
| CP_MJ2         | 13.01      | 9.46   | -2.45      | 65.04      | 54.05  | -4.30      |
| PI_PI          | 21.95      | 17.57  | -2.25      | 74.80      | 71.62  | 6.16       |
| AP_DOPE        | 15.45      | 12.16  | -1.82      | 67.48      | 59.46  | -0.50      |
| TRANS_S        | 15.45      | 12.16  | -1.82      | 65.85      | 59.46  | 1.20       |
| CP_E3D_MIN     | 22.76      | 18.92  | -1.51      | 62.60      | 58.11  | 3.00       |
| ROT_S          | 14.63      | 12.16  | -0.97      | 54.47      | 43.24  | -5.99      |
| CP_Qa          | 35.77      | 31.08  | -0.78      | 83.74      | 77.03  | 3.19       |
| CP_DDGu        | 23.58      | 20.27  | -0.77      | 75.61      | 64.86  | -2.62      |
| CP_RO          | 23.58      | 20.27  | -0.77      | 73.17      | 59.46  | -6.43      |
| CHARMM_SASA    | 21.95      | 18.92  | -0.66      | 63.41      | 52.70  | -4.20      |
| AP_MPS         | 32.52      | 28.38  | -0.56      | 78.86      | 70.27  | 0.34       |
| AP_GOAP_G      | 20.33      | 17.57  | -0.55      | 68.29      | 62.16  | 1.83       |
| CP_ZPAIR_CB    | 8.13       | 6.76   | -0.54      | 51.22      | 39.19  | -7.36      |
| CP_E3DC_CB     | 6.50       | 5.41   | -0.43      | 47.97      | 33.78  | -10.32     |
| CP_GKS         | 6.50       | 5.41   | -0.43      | 60.98      | 54.05  | -0.07      |
| AP_ACE         | 27.64      | 24.32  | -0.24      | 65.85      | 59.46  | 1.20       |
| CP_MSBM        | 15.45      | 13.51  | -0.23      | 63.41      | 52.70  | -4.20      |
| FA_REP         | 15.45      | 13.51  | -0.23      | 70.73      | 60.81  | -2.30      |
| CP_ZLOCAL_CB   | 12.20      | 10.81  | -0.01      | 65.85      | 52.70  | -6.74      |
| FA_PP          | 12.20      | 10.81  | -0.01      | 69.92      | 64.86  | 3.31       |
| CP_ZLOCAL_MIN  | 10.57      | 9.46   | 0.09       | 60.16      | 47.30  | -7.16      |
| CP_TEs         | 33.33      | 29.73  | 0.17       | 80.49      | 68.92  | -2.95      |
| SPIDER         | 33.33      | 29.73  | 0.17       | 68.29      | 58.11  | -2.93      |
| CP_ZS3DC_CB    | 17.89      | 16.22  | 0.40       | 74.80      | 64.86  | -1.78      |
| CP_BL          | 16.26      | 14.86  | 0.51       | 65.04      | 56.76  | -1.13      |
| ODA            | 26.83      | 24.32  | 0.61       | 78.86      | 64.86  | -6.01      |
| CP_MIXRANK_MIN | 34.15      | 31.08  | 0.91       | 82.11      | 75.68  | 3.30       |
| AP_GOAP_ALL    | 32.52      | 29.73  | 1.02       | 76.42      | 64.86  | -3.47      |
| CG_VDW         | 20.33      | 18.92  | 1.04       | 66.67      | 60.81  | 1.94       |
| CP_E3D_CB      | 17.07      | 16.22  | 1.25       | 56.10      | 47.30  | -2.92      |
| CP_ES3DC_CB    | 17.07      | 16.22  | 1.25       | 74.80      | 60.81  | -6.54      |
| CHARMM_TOT     | 39.84      | 36.49  | 1.33       | 81.30      | 71.62  | -0.62      |
| CP_Qm          | 39.84      | 36.49  | 1.33       | 82.11      | 71.62  | -1.47      |
| CP_BT          | 37.40      | 35.14  | 2.29       | 85.37      | 75.68  | -0.09      |
| CG_BETA        | 13.01      | 13.51  | 2.31       | 62.60      | 47.30  | -9.70      |
| CHARMM_VDW     | 18.70      | 18.92  | 2.73       | 62.60      | 55.41  | -0.17      |
| CP_SJKG        | 41.46      | 39.19  | 2.81       | 80.49      | 71.62  | 0.23       |
| ELE            | 31.71      | 31.08  | 3.46       | 78.86      | 70.27  | 0.34       |
| AP_DOPE_HR     | 19.51      | 20.27  | 3.47       | 72.36      | 59.46  | -5.58      |
| NHB            | 19.51      | 20.27  | 3.47       | 73.98      | 66.22  | 0.66       |
| AP_DDGu        | 30.08      | 29.73  | 3.56       | 76.42      | 72.97  | 6.05       |
| CP_TEI         | 40.65      | 39.19  | 3.66       | 82.11      | 72.97  | 0.12       |
| DESOLV         | 37.40      | 36.49  | 3.87       | 79.67      | 68.92  | -2.10      |
| CG_ENV         | 34.15      | 33.78  | 4.09       | 76.42      | 67.57  | -0.30      |

Table continued on next page

Table continued from previous page

| Method       | Top 10     |        |            | Top 100    |        |            |
|--------------|------------|--------|------------|------------|--------|------------|
|              | Acceptable | Medium | Difference | Acceptable | Medium | Difference |
| HBOND2       | 18.70      | 20.27  | 4.32       | 64.23      | 59.46  | 2.89       |
| CP_SKOb      | 41.46      | 40.54  | 4.40       | 83.74      | 74.32  | 0.01       |
| AP_DARS      | 39.84      | 39.19  | 4.51       | 79.67      | 71.62  | 1.08       |
| FIREDOCK_EI  | 38.21      | 37.84  | 4.61       | 82.11      | 72.97  | 0.12       |
| SIPPER       | 45.53      | 44.59  | 4.92       | 88.62      | 75.68  | -3.48      |
| INSIDE       | 21.14      | 22.97  | 4.95       | 74.80      | 60.81  | -6.54      |
| CP_RMFCEN2   | 26.83      | 28.38  | 5.37       | 73.98      | 67.57  | 2.25       |
| CP_TS        | 23.58      | 25.68  | 5.58       | 66.67      | 60.81  | 1.94       |
| FA_ATR       | 23.58      | 25.68  | 5.58       | 66.67      | 59.46  | 0.35       |
| ATTRACT      | 30.89      | 32.43  | 5.89       | 75.61      | 68.92  | 2.14       |
| HBOND        | 18.70      | 21.62  | 5.91       | 65.04      | 63.51  | 6.81       |
| PROPNSTS     | 41.46      | 41.89  | 5.99       | 87.80      | 79.73  | 2.13       |
| CP_ELOCAL_CB | 17.07      | 20.27  | 6.01       | 57.72      | 45.95  | -6.20      |
| CP_MJ3h      | 48.78      | 48.65  | 6.30       | 84.55      | 72.97  | -2.42      |
| VDW          | 21.14      | 24.32  | 6.54       | 65.85      | 56.76  | -1.98      |
| PISA         | 44.72      | 45.95  | 7.36       | 83.74      | 71.62  | -3.16      |
| CP_RMFCA     | 32.52      | 35.14  | 7.37       | 78.05      | 67.57  | -1.99      |
| AP_URS       | 20.33      | 24.32  | 7.38       | 68.29      | 58.11  | -2.93      |
| CP_Qp        | 39.84      | 41.89  | 7.68       | 78.86      | 74.32  | 5.10       |
| CP_TD        | 39.84      | 41.89  | 7.68       | 83.74      | 75.68  | 1.60       |
| ALIPH        | 26.02      | 29.73  | 7.80       | 66.67      | 60.81  | 1.94       |
| CP_RMFCEN1   | 26.02      | 29.73  | 7.80       | 75.61      | 66.22  | -1.04      |
| AP_OPUS_PSP  | 48.78      | 50.00  | 7.88       | 82.93      | 75.68  | 2.45       |
| CP_DDGrw     | 24.39      | 28.38  | 7.91       | 73.98      | 62.16  | -4.10      |
| CP_SKOIP     | 45.53      | 47.30  | 8.10       | 82.93      | 74.32  | 0.86       |
| ROSETTADOCK  | 33.33      | 36.49  | 8.11       | 78.05      | 72.97  | 4.36       |
| PYDOCK_TOT   | 43.90      | 45.95  | 8.21       | 85.37      | 72.97  | -3.27      |
| CHARMM_ELE   | 31.71      | 35.14  | 8.22       | 78.05      | 67.57  | -1.99      |
| CP_SKOa      | 42.28      | 44.59  | 8.31       | 80.49      | 68.92  | -2.95      |
| AP_DCOMPLEX  | 30.08      | 33.78  | 8.33       | 74.80      | 71.62  | 6.16       |
| AP_GEOMETRIC | 30.08      | 33.78  | 8.33       | 74.80      | 67.57  | 1.40       |
| CP_VD        | 30.08      | 33.78  | 8.33       | 75.61      | 67.57  | 0.55       |
| CP_MJ2h      | 28.46      | 32.43  | 8.43       | 74.80      | 60.81  | -6.54      |
| AP_GOAP_DF   | 25.20      | 29.73  | 8.65       | 73.17      | 63.51  | -1.67      |
| ZRANK2       | 55.28      | 56.76  | 9.04       | 86.99      | 81.08  | 4.56       |
| FIREDOCK_AB  | 38.21      | 41.89  | 9.38       | 81.30      | 74.32  | 2.56       |
| CP_TSC       | 47.15      | 50.00  | 9.58       | 86.99      | 78.38  | 1.39       |
| CP_BFKV      | 43.90      | 47.30  | 9.79       | 80.49      | 71.62  | 0.23       |
| CP_ES3DC_MIN | 40.65      | 44.59  | 10.01      | 82.11      | 72.97  | 0.12       |
| CP_TB        | 40.65      | 44.59  | 10.01      | 83.74      | 71.62  | -3.16      |
| FIREDOCK     | 40.65      | 44.59  | 10.01      | 81.30      | 74.32  | 2.56       |
| CP_MJPL      | 16.26      | 22.97  | 10.03      | 65.85      | 59.46  | 1.20       |
| AP_dDFIRE    | 26.83      | 32.43  | 10.13      | 74.80      | 67.57  | 1.40       |
| AP_calRW     | 23.58      | 29.73  | 10.34      | 72.36      | 63.51  | -0.82      |
| AP_calRWp    | 23.58      | 29.73  | 10.34      | 73.17      | 63.51  | -1.67      |
| AP_DFIRE2    | 21.95      | 28.38  | 10.45      | 74.80      | 63.51  | -3.36      |
| CP_HLPL      | 42.28      | 47.30  | 11.49      | 81.30      | 75.68  | 4.14       |
| CP_ZS3DC_MIN | 39.02      | 44.59  | 11.70      | 82.11      | 74.32  | 1.71       |
| CP_DECK      | 44.72      | 50.00  | 12.12      | 84.55      | 81.08  | 7.10       |
| ZRANK        | 34.96      | 43.24  | 14.35      | 81.30      | 75.68  | 4.14       |
| AP_T1        | 43.90      | 51.35  | 14.55      | 82.93      | 74.32  | 0.86       |
| AP_T2        | 45.53      | 54.05  | 16.03      | 81.30      | 77.03  | 5.73       |

**Supplementary Table 3.** A comparison of the sets of complexes for which an acceptable or better solution could be found in the top 10 structures. For each pair of scoring functions,  $A$  and  $B$ , their size ( $|A|$  and  $|B|$ ), unison ( $|A \cup B|$ ), symmetric difference ( $|A \ominus B|$ ) and relative complements ( $|A \setminus B|$  and  $|B \setminus A|$ ), are shown.

| Method A    | Method B    | $ A $ | $ B $ | $ A \cup B $ | $ A \ominus B $ | $ A \setminus B $ | $ B \setminus A $ |
|-------------|-------------|-------|-------|--------------|-----------------|-------------------|-------------------|
| ZRANK2      | AP_T1       | 68    | 54    | 74           | 26              | 20                | 6                 |
| PISA        | AP_T1       | 55    | 54    | 66           | 23              | 12                | 11                |
| PISA        | ZRANK2      | 55    | 68    | 72           | 21              | 4                 | 17                |
| AP_T2       | AP_T1       | 56    | 54    | 64           | 18              | 10                | 8                 |
| AP_T2       | ZRANK2      | 56    | 68    | 72           | 20              | 4                 | 16                |
| AP_T2       | PISA        | 56    | 55    | 67           | 23              | 12                | 11                |
| PYDOCK_TOT  | AP_T1       | 54    | 54    | 69           | 30              | 15                | 15                |
| PYDOCK_TOT  | ZRANK2      | 54    | 68    | 76           | 30              | 8                 | 22                |
| PYDOCK_TOT  | PISA        | 54    | 55    | 73           | 37              | 18                | 19                |
| PYDOCK_TOT  | AP_T2       | 54    | 56    | 71           | 32              | 15                | 17                |
| FIREDOCK_AB | AP_T1       | 47    | 54    | 63           | 25              | 9                 | 16                |
| FIREDOCK_AB | ZRANK2      | 47    | 68    | 72           | 29              | 4                 | 25                |
| FIREDOCK_AB | PISA        | 47    | 55    | 63           | 24              | 8                 | 16                |
| FIREDOCK_AB | AP_T2       | 47    | 56    | 63           | 23              | 7                 | 16                |
| FIREDOCK_AB | PYDOCK_TOT  | 47    | 54    | 64           | 27              | 10                | 17                |
| FIREDOCK    | AP_T1       | 50    | 54    | 63           | 22              | 9                 | 13                |
| FIREDOCK    | ZRANK2      | 50    | 68    | 74           | 30              | 6                 | 24                |
| FIREDOCK    | PISA        | 50    | 55    | 67           | 29              | 12                | 17                |
| FIREDOCK    | AP_T2       | 50    | 56    | 63           | 20              | 7                 | 13                |
| FIREDOCK    | PYDOCK_TOT  | 50    | 54    | 64           | 24              | 10                | 14                |
| FIREDOCK    | FIREDOCK_AB | 50    | 47    | 53           | 9               | 6                 | 3                 |
| CP_SKOIP    | AP_T1       | 56    | 54    | 72           | 34              | 18                | 16                |
| CP_SKOIP    | ZRANK2      | 56    | 68    | 76           | 28              | 8                 | 20                |
| CP_SKOIP    | PISA        | 56    | 55    | 73           | 35              | 18                | 17                |
| CP_SKOIP    | AP_T2       | 56    | 56    | 73           | 34              | 17                | 17                |
| CP_SKOIP    | PYDOCK_TOT  | 56    | 54    | 72           | 34              | 18                | 16                |
| CP_SKOIP    | FIREDOCK_AB | 56    | 47    | 73           | 43              | 26                | 17                |
| CP_SKOIP    | FIREDOCK    | 56    | 50    | 72           | 38              | 22                | 16                |
| CP_BFKV     | AP_T1       | 54    | 54    | 74           | 40              | 20                | 20                |
| CP_BFKV     | ZRANK2      | 54    | 68    | 80           | 38              | 12                | 26                |
| CP_BFKV     | PISA        | 54    | 55    | 74           | 39              | 19                | 20                |
| CP_BFKV     | AP_T2       | 54    | 56    | 72           | 34              | 16                | 18                |
| CP_BFKV     | PYDOCK_TOT  | 54    | 54    | 74           | 40              | 20                | 20                |
| CP_BFKV     | FIREDOCK_AB | 54    | 47    | 73           | 45              | 26                | 19                |
| CP_BFKV     | FIREDOCK    | 54    | 50    | 75           | 46              | 25                | 21                |
| CP_BFKV     | CP_SKOIP    | 54    | 56    | 76           | 42              | 20                | 22                |
| FIREDOCK_EI | AP_T1       | 47    | 54    | 63           | 25              | 9                 | 16                |
| FIREDOCK_EI | ZRANK2      | 47    | 68    | 75           | 35              | 7                 | 28                |
| FIREDOCK_EI | PISA        | 47    | 55    | 64           | 26              | 9                 | 17                |
| FIREDOCK_EI | AP_T2       | 47    | 56    | 66           | 29              | 10                | 19                |
| FIREDOCK_EI | PYDOCK_TOT  | 47    | 54    | 63           | 25              | 9                 | 16                |
| FIREDOCK_EI | FIREDOCK_AB | 47    | 47    | 54           | 14              | 7                 | 7                 |
| FIREDOCK_EI | FIREDOCK    | 47    | 50    | 54           | 11              | 4                 | 7                 |
| FIREDOCK_EI | CP_SKOIP    | 47    | 56    | 69           | 35              | 13                | 22                |
| FIREDOCK_EI | CP_BFKV     | 47    | 54    | 73           | 45              | 19                | 26                |
| CP_DECK     | AP_T1       | 55    | 54    | 72           | 35              | 18                | 17                |
| CP_DECK     | ZRANK2      | 55    | 68    | 77           | 31              | 9                 | 22                |
| CP_DECK     | PISA        | 55    | 55    | 70           | 30              | 15                | 15                |
| CP_DECK     | AP_T2       | 55    | 56    | 74           | 37              | 18                | 19                |
| CP_DECK     | PYDOCK_TOT  | 55    | 54    | 73           | 37              | 19                | 18                |
| CP_DECK     | FIREDOCK_AB | 55    | 47    | 72           | 42              | 25                | 17                |
| CP_DECK     | FIREDOCK    | 55    | 50    | 72           | 39              | 22                | 17                |
| CP_DECK     | CP_SKOIP    | 55    | 56    | 72           | 33              | 16                | 17                |
| CP_DECK     | CP_BFKV     | 55    | 54    | 76           | 43              | 22                | 21                |
| CP_DECK     | FIREDOCK_EI | 55    | 47    | 71           | 40              | 24                | 16                |
| AP_OPUS_PSP | AP_T1       | 60    | 54    | 69           | 24              | 15                | 9                 |
| AP_OPUS_PSP | ZRANK2      | 60    | 68    | 73           | 18              | 5                 | 13                |
| AP_OPUS_PSP | PISA        | 60    | 55    | 68           | 21              | 13                | 8                 |
| AP_OPUS_PSP | AP_T2       | 60    | 56    | 71           | 26              | 15                | 11                |
| AP_OPUS_PSP | PYDOCK_TOT  | 60    | 54    | 74           | 34              | 20                | 14                |
| AP_OPUS_PSP | FIREDOCK_AB | 60    | 47    | 69           | 31              | 22                | 9                 |
| AP_OPUS_PSP | FIREDOCK    | 60    | 50    | 71           | 32              | 21                | 11                |
| AP_OPUS_PSP | CP_SKOIP    | 60    | 56    | 73           | 30              | 17                | 13                |

Table continued on next page

Table continued from previous page

| Method A    | Method B    | $ A $ | $ B $ | $ A \cup B $ | $ A \ominus B $ | $ A \setminus B $ | $ B \setminus A $ |
|-------------|-------------|-------|-------|--------------|-----------------|-------------------|-------------------|
| AP_OPUS_PSP | CP_BFKV     | 60    | 54    | 77           | 40              | 23                | 17                |
| AP_OPUS_PSP | FIREDOCK_EI | 60    | 47    | 69           | 31              | 22                | 9                 |
| AP_OPUS_PSP | CP_DECK     | 60    | 55    | 73           | 31              | 18                | 13                |
| ZRANK       | AP_T1       | 43    | 54    | 58           | 19              | 4                 | 15                |
| ZRANK       | ZRANK2      | 43    | 68    | 70           | 29              | 2                 | 27                |
| ZRANK       | PISA        | 43    | 55    | 61           | 24              | 6                 | 18                |
| ZRANK       | AP_T2       | 43    | 56    | 61           | 23              | 5                 | 18                |
| ZRANK       | PYDOCK_TOT  | 43    | 54    | 64           | 31              | 10                | 21                |
| ZRANK       | FIREDOCK_AB | 43    | 47    | 51           | 12              | 4                 | 8                 |
| ZRANK       | FIREDOCK    | 43    | 50    | 54           | 15              | 4                 | 11                |
| ZRANK       | CP_SKOIP    | 43    | 56    | 72           | 45              | 16                | 29                |
| ZRANK       | CP_BFKV     | 43    | 54    | 70           | 43              | 16                | 27                |
| ZRANK       | FIREDOCK_EI | 43    | 47    | 55           | 20              | 8                 | 12                |
| ZRANK       | CP_DECK     | 43    | 55    | 71           | 44              | 16                | 28                |
| ZRANK       | AP_OPUS_PSP | 43    | 60    | 66           | 29              | 6                 | 23                |
| CP_BT       | AP_T1       | 46    | 54    | 63           | 26              | 9                 | 17                |
| CP_BT       | ZRANK2      | 46    | 68    | 75           | 36              | 7                 | 29                |
| CP_BT       | PISA        | 46    | 55    | 67           | 33              | 12                | 21                |
| CP_BT       | AP_T2       | 46    | 56    | 65           | 28              | 9                 | 19                |
| CP_BT       | PYDOCK_TOT  | 46    | 54    | 68           | 36              | 14                | 22                |
| CP_BT       | FIREDOCK_AB | 46    | 47    | 62           | 31              | 15                | 16                |
| CP_BT       | FIREDOCK    | 46    | 50    | 65           | 34              | 15                | 19                |
| CP_BT       | CP_SKOIP    | 46    | 56    | 73           | 44              | 17                | 27                |
| CP_BT       | CP_BFKV     | 46    | 54    | 60           | 20              | 6                 | 14                |
| CP_BT       | FIREDOCK_EI | 46    | 47    | 64           | 35              | 17                | 18                |
| CP_BT       | CP_DECK     | 46    | 55    | 70           | 39              | 15                | 24                |
| CP_BT       | AP_OPUS_PSP | 46    | 60    | 69           | 32              | 9                 | 23                |
| CP_BT       | ZRANK       | 46    | 43    | 60           | 31              | 17                | 14                |
| CP_TSC      | AP_T1       | 58    | 54    | 69           | 26              | 15                | 11                |
| CP_TSC      | ZRANK2      | 58    | 68    | 73           | 20              | 5                 | 15                |
| CP_TSC      | PISA        | 58    | 55    | 71           | 29              | 16                | 13                |
| CP_TSC      | AP_T2       | 58    | 56    | 69           | 24              | 13                | 11                |
| CP_TSC      | PYDOCK_TOT  | 58    | 54    | 75           | 38              | 21                | 17                |
| CP_TSC      | FIREDOCK_AB | 58    | 47    | 69           | 33              | 22                | 11                |
| CP_TSC      | FIREDOCK    | 58    | 50    | 72           | 36              | 22                | 14                |
| CP_TSC      | CP_SKOIP    | 58    | 56    | 76           | 38              | 20                | 18                |
| CP_TSC      | CP_BFKV     | 58    | 54    | 76           | 40              | 22                | 18                |
| CP_TSC      | FIREDOCK_EI | 58    | 47    | 74           | 43              | 27                | 16                |
| CP_TSC      | CP_DECK     | 58    | 55    | 75           | 37              | 20                | 17                |
| CP_TSC      | AP_OPUS_PSP | 58    | 60    | 72           | 26              | 12                | 14                |
| CP_TSC      | ZRANK       | 58    | 43    | 66           | 31              | 23                | 8                 |
| CP_TSC      | CP_BT       | 58    | 46    | 68           | 32              | 22                | 10                |
| CP_RMFCA    | AP_T1       | 40    | 54    | 60           | 26              | 6                 | 20                |
| CP_RMFCA    | ZRANK2      | 40    | 68    | 70           | 32              | 2                 | 30                |
| CP_RMFCA    | PISA        | 40    | 55    | 60           | 25              | 5                 | 20                |
| CP_RMFCA    | AP_T2       | 40    | 56    | 61           | 26              | 5                 | 21                |
| CP_RMFCA    | PYDOCK_TOT  | 40    | 54    | 60           | 26              | 6                 | 20                |
| CP_RMFCA    | FIREDOCK_AB | 40    | 47    | 55           | 23              | 8                 | 15                |
| CP_RMFCA    | FIREDOCK    | 40    | 50    | 59           | 28              | 9                 | 19                |
| CP_RMFCA    | CP_SKOIP    | 40    | 56    | 66           | 36              | 10                | 26                |
| CP_RMFCA    | CP_BFKV     | 40    | 54    | 65           | 36              | 11                | 25                |
| CP_RMFCA    | FIREDOCK_EI | 40    | 47    | 56           | 25              | 9                 | 16                |
| CP_RMFCA    | CP_DECK     | 40    | 55    | 68           | 41              | 13                | 28                |
| CP_RMFCA    | AP_OPUS_PSP | 40    | 60    | 65           | 30              | 5                 | 25                |
| CP_RMFCA    | ZRANK       | 40    | 43    | 51           | 19              | 8                 | 11                |
| CP_RMFCA    | CP_BT       | 40    | 46    | 57           | 28              | 11                | 17                |
| CP_RMFCA    | CP_TSC      | 40    | 58    | 64           | 30              | 6                 | 24                |
| CP_TEI      | AP_T1       | 50    | 54    | 70           | 36              | 16                | 20                |
| CP_TEI      | ZRANK2      | 50    | 68    | 75           | 32              | 7                 | 25                |
| CP_TEI      | PISA        | 50    | 55    | 72           | 39              | 17                | 22                |
| CP_TEI      | AP_T2       | 50    | 56    | 71           | 36              | 15                | 21                |
| CP_TEI      | PYDOCK_TOT  | 50    | 54    | 70           | 36              | 16                | 20                |
| CP_TEI      | FIREDOCK_AB | 50    | 47    | 68           | 39              | 21                | 18                |
| CP_TEI      | FIREDOCK    | 50    | 50    | 70           | 40              | 20                | 20                |
| CP_TEI      | CP_SKOIP    | 50    | 56    | 72           | 38              | 16                | 22                |
| CP_TEI      | CP_BFKV     | 50    | 54    | 67           | 30              | 13                | 17                |
| CP_TEI      | FIREDOCK_EI | 50    | 47    | 68           | 39              | 21                | 18                |
| CP_TEI      | CP_DECK     | 50    | 55    | 71           | 37              | 16                | 21                |

Table continued on next page

Table continued from previous page

| Method A | Method B    | $ A $ | $ B $ | $ A \cup B $ | $ A \ominus B $ | $ A \setminus B $ | $ B \setminus A $ |
|----------|-------------|-------|-------|--------------|-----------------|-------------------|-------------------|
| CP_TEl   | AP_OPUS_PSP | 50    | 60    | 75           | 40              | 15                | 25                |
| CP_TEl   | ZRANK       | 50    | 43    | 66           | 39              | 23                | 16                |
| CP_TEl   | CP_BT       | 50    | 46    | 62           | 28              | 16                | 12                |
| CP_TEl   | CP_TSC      | 50    | 58    | 70           | 32              | 12                | 20                |
| CP_TEl   | CP_RMFCa    | 50    | 40    | 64           | 38              | 24                | 14                |
| CP_TD    | AP_T1       | 49    | 54    | 68           | 33              | 14                | 19                |
| CP_TD    | ZRANK2      | 49    | 68    | 74           | 31              | 6                 | 25                |
| CP_TD    | PISA        | 49    | 55    | 68           | 32              | 13                | 19                |
| CP_TD    | AP_T2       | 49    | 56    | 70           | 35              | 14                | 21                |
| CP_TD    | PYDOCK_TOT  | 49    | 54    | 71           | 39              | 17                | 22                |
| CP_TD    | FIREDOCK_AB | 49    | 47    | 65           | 34              | 18                | 16                |
| CP_TD    | FIREDOCK    | 49    | 50    | 67           | 35              | 17                | 18                |
| CP_TD    | CP_SKOIP    | 49    | 56    | 69           | 33              | 13                | 20                |
| CP_TD    | CP_BFKV     | 49    | 54    | 68           | 33              | 14                | 19                |
| CP_TD    | FIREDOCK_EI | 49    | 47    | 65           | 34              | 18                | 16                |
| CP_TD    | CP_DECK     | 49    | 55    | 65           | 26              | 10                | 16                |
| CP_TD    | AP_OPUS_PSP | 49    | 60    | 70           | 31              | 10                | 21                |
| CP_TD    | ZRANK       | 49    | 43    | 65           | 38              | 22                | 16                |
| CP_TD    | CP_BT       | 49    | 46    | 60           | 25              | 14                | 11                |
| CP_TD    | CP_TSC      | 49    | 58    | 70           | 33              | 12                | 21                |
| CP_TD    | CP_RMFCa    | 49    | 40    | 63           | 37              | 23                | 14                |
| CP_TD    | CP_TEl      | 49    | 50    | 64           | 29              | 14                | 15                |
| CP_MJ3h  | AP_T1       | 60    | 54    | 71           | 28              | 17                | 11                |
| CP_MJ3h  | ZRANK2      | 60    | 68    | 78           | 28              | 10                | 18                |
| CP_MJ3h  | PISA        | 60    | 55    | 74           | 33              | 19                | 14                |
| CP_MJ3h  | AP_T2       | 60    | 56    | 73           | 30              | 17                | 13                |
| CP_MJ3h  | PYDOCK_TOT  | 60    | 54    | 70           | 26              | 16                | 10                |
| CP_MJ3h  | FIREDOCK_AB | 60    | 47    | 70           | 33              | 23                | 10                |
| CP_MJ3h  | FIREDOCK    | 60    | 50    | 69           | 28              | 19                | 9                 |
| CP_MJ3h  | CP_SKOIP    | 60    | 56    | 74           | 32              | 18                | 14                |
| CP_MJ3h  | CP_BFKV     | 60    | 54    | 72           | 30              | 18                | 12                |
| CP_MJ3h  | FIREDOCK_EI | 60    | 47    | 68           | 29              | 21                | 8                 |
| CP_MJ3h  | CP_DECK     | 60    | 55    | 75           | 35              | 20                | 15                |
| CP_MJ3h  | AP_OPUS_PSP | 60    | 60    | 73           | 26              | 13                | 13                |
| CP_MJ3h  | ZRANK       | 60    | 43    | 69           | 35              | 26                | 9                 |
| CP_MJ3h  | CP_BT       | 60    | 46    | 65           | 24              | 19                | 5                 |
| CP_MJ3h  | CP_TSC      | 60    | 58    | 75           | 32              | 17                | 15                |
| CP_MJ3h  | CP_RMFCa    | 60    | 40    | 68           | 36              | 28                | 8                 |
| CP_MJ3h  | CP_TEl      | 60    | 50    | 66           | 22              | 16                | 6                 |
| CP_MJ3h  | CP_TD       | 60    | 49    | 65           | 21              | 16                | 5                 |
| AP_DARS  | AP_T1       | 49    | 54    | 72           | 41              | 18                | 23                |
| AP_DARS  | ZRANK2      | 49    | 68    | 78           | 39              | 10                | 29                |
| AP_DARS  | PISA        | 49    | 55    | 71           | 38              | 16                | 22                |
| AP_DARS  | AP_T2       | 49    | 56    | 71           | 37              | 15                | 22                |
| AP_DARS  | PYDOCK_TOT  | 49    | 54    | 69           | 35              | 15                | 20                |
| AP_DARS  | FIREDOCK_AB | 49    | 47    | 68           | 40              | 21                | 19                |
| AP_DARS  | FIREDOCK    | 49    | 50    | 66           | 33              | 16                | 17                |
| AP_DARS  | CP_SKOIP    | 49    | 56    | 64           | 23              | 8                 | 15                |
| AP_DARS  | CP_BFKV     | 49    | 54    | 74           | 45              | 20                | 25                |
| AP_DARS  | FIREDOCK_EI | 49    | 47    | 65           | 34              | 18                | 16                |
| AP_DARS  | CP_DECK     | 49    | 55    | 71           | 38              | 16                | 22                |
| AP_DARS  | AP_OPUS_PSP | 49    | 60    | 74           | 39              | 14                | 25                |
| AP_DARS  | ZRANK       | 49    | 43    | 69           | 46              | 26                | 20                |
| AP_DARS  | CP_BT       | 49    | 46    | 69           | 43              | 23                | 20                |
| AP_DARS  | CP_TSC      | 49    | 58    | 77           | 47              | 19                | 28                |
| AP_DARS  | CP_RMFCa    | 49    | 40    | 62           | 35              | 22                | 13                |
| AP_DARS  | CP_TEl      | 49    | 50    | 70           | 41              | 20                | 21                |
| AP_DARS  | CP_TD       | 49    | 49    | 69           | 40              | 20                | 20                |
| AP_DARS  | CP_MJ3h     | 49    | 60    | 71           | 33              | 11                | 22                |
| CP_SKOOb | AP_T1       | 51    | 54    | 73           | 41              | 19                | 22                |
| CP_SKOOb | ZRANK2      | 51    | 68    | 77           | 35              | 9                 | 26                |
| CP_SKOOb | PISA        | 51    | 55    | 70           | 34              | 15                | 19                |
| CP_SKOOb | AP_T2       | 51    | 56    | 71           | 35              | 15                | 20                |
| CP_SKOOb | PYDOCK_TOT  | 51    | 54    | 74           | 43              | 20                | 23                |
| CP_SKOOb | FIREDOCK_AB | 51    | 47    | 72           | 46              | 25                | 21                |
| CP_SKOOb | FIREDOCK    | 51    | 50    | 73           | 45              | 23                | 22                |
| CP_SKOOb | CP_SKOIP    | 51    | 56    | 70           | 33              | 14                | 19                |
| CP_SKOOb | CP_BFKV     | 51    | 54    | 62           | 19              | 8                 | 11                |

Table continued on next page

Table continued from previous page

| Method A            | Method B            | $ A $ | $ B $ | $ A \cup B $ | $ A \ominus B $ | $ A \setminus B $ | $ B \setminus A $ |
|---------------------|---------------------|-------|-------|--------------|-----------------|-------------------|-------------------|
| CP_SKO <sub>b</sub> | FIREDOCK_EI         | 51    | 47    | 73           | 48              | 26                | 22                |
| CP_SKO <sub>b</sub> | CP_DECK             | 51    | 55    | 71           | 36              | 16                | 20                |
| CP_SKO <sub>b</sub> | AP_OPUS_PSP         | 51    | 60    | 72           | 33              | 12                | 21                |
| CP_SKO <sub>b</sub> | ZRANK               | 51    | 43    | 71           | 48              | 28                | 20                |
| CP_SKO <sub>b</sub> | CP_BT               | 51    | 46    | 64           | 31              | 18                | 13                |
| CP_SKO <sub>b</sub> | CP_TSC              | 51    | 58    | 73           | 37              | 15                | 22                |
| CP_SKO <sub>b</sub> | CP_RMFCFA           | 51    | 40    | 64           | 37              | 24                | 13                |
| CP_SKO <sub>b</sub> | CP_TEI              | 51    | 50    | 67           | 33              | 17                | 16                |
| CP_SKO <sub>b</sub> | CP_TD               | 51    | 49    | 66           | 32              | 17                | 15                |
| CP_SKO <sub>b</sub> | CP_MJ3h             | 51    | 60    | 73           | 35              | 13                | 22                |
| CP_SKO <sub>b</sub> | AP_DARS             | 51    | 49    | 68           | 36              | 19                | 17                |
| CP_TB               | AP_T1               | 50    | 54    | 66           | 28              | 12                | 16                |
| CP_TB               | ZRANK2              | 50    | 68    | 73           | 28              | 5                 | 23                |
| CP_TB               | PISA                | 50    | 55    | 68           | 31              | 13                | 18                |
| CP_TB               | AP_T2               | 50    | 56    | 67           | 28              | 11                | 17                |
| CP_TB               | PYDOCK_TOT          | 50    | 54    | 66           | 28              | 12                | 16                |
| CP_TB               | FIREDOCK_AB         | 50    | 47    | 61           | 25              | 14                | 11                |
| CP_TB               | FIREDOCK            | 50    | 50    | 65           | 30              | 15                | 15                |
| CP_TB               | CP_SKOIP            | 50    | 56    | 70           | 34              | 14                | 20                |
| CP_TB               | CP_BFKV             | 50    | 54    | 68           | 32              | 14                | 18                |
| CP_TB               | FIREDOCK_EI         | 50    | 47    | 66           | 35              | 19                | 16                |
| CP_TB               | CP_DECK             | 50    | 55    | 71           | 37              | 16                | 21                |
| CP_TB               | AP_OPUS_PSP         | 50    | 60    | 69           | 28              | 9                 | 19                |
| CP_TB               | ZRANK               | 50    | 43    | 60           | 27              | 17                | 10                |
| CP_TB               | CP_BT               | 50    | 46    | 62           | 28              | 16                | 12                |
| CP_TB               | CP_TSC              | 50    | 58    | 68           | 28              | 10                | 18                |
| CP_TB               | CP_RMFCFA           | 50    | 40    | 59           | 28              | 19                | 9                 |
| CP_TB               | CP_TEI              | 50    | 50    | 64           | 28              | 14                | 14                |
| CP_TB               | CP_TD               | 50    | 49    | 65           | 31              | 16                | 15                |
| CP_TB               | CP_MJ3h             | 50    | 60    | 67           | 24              | 7                 | 17                |
| CP_TB               | AP_DARS             | 50    | 49    | 70           | 41              | 21                | 20                |
| CP_TB               | CP_SKO <sub>b</sub> | 50    | 51    | 68           | 35              | 17                | 18                |
| SPIDER              | AP_T1               | 41    | 54    | 65           | 35              | 11                | 24                |
| SPIDER              | ZRANK2              | 41    | 68    | 77           | 45              | 9                 | 36                |
| SPIDER              | PISA                | 41    | 55    | 65           | 34              | 10                | 24                |
| SPIDER              | AP_T2               | 41    | 56    | 65           | 33              | 9                 | 24                |
| SPIDER              | PYDOCK_TOT          | 41    | 54    | 67           | 39              | 13                | 26                |
| SPIDER              | FIREDOCK_AB         | 41    | 47    | 59           | 30              | 12                | 18                |
| SPIDER              | FIREDOCK            | 41    | 50    | 62           | 33              | 12                | 21                |
| SPIDER              | CP_SKOIP            | 41    | 56    | 74           | 51              | 18                | 33                |
| SPIDER              | CP_BFKV             | 41    | 54    | 72           | 49              | 18                | 31                |
| SPIDER              | FIREDOCK_EI         | 41    | 47    | 61           | 34              | 14                | 20                |
| SPIDER              | CP_DECK             | 41    | 55    | 73           | 50              | 18                | 32                |
| SPIDER              | AP_OPUS_PSP         | 41    | 60    | 72           | 43              | 12                | 31                |
| SPIDER              | ZRANK               | 41    | 43    | 55           | 26              | 12                | 14                |
| SPIDER              | CP_BT               | 41    | 46    | 60           | 33              | 14                | 19                |
| SPIDER              | CP_TSC              | 41    | 58    | 69           | 39              | 11                | 28                |
| SPIDER              | CP_RMFCFA           | 41    | 40    | 55           | 29              | 15                | 14                |
| SPIDER              | CP_TEI              | 41    | 50    | 69           | 47              | 19                | 28                |
| SPIDER              | CP_TD               | 41    | 49    | 64           | 38              | 15                | 23                |
| SPIDER              | CP_MJ3h             | 41    | 60    | 69           | 37              | 9                 | 28                |
| SPIDER              | AP_DARS             | 41    | 49    | 67           | 44              | 18                | 26                |
| SPIDER              | CP_SKO <sub>b</sub> | 41    | 51    | 74           | 56              | 23                | 33                |
| SPIDER              | CP_TB               | 41    | 50    | 66           | 41              | 16                | 25                |
| SIPPER              | AP_T1               | 56    | 54    | 73           | 36              | 19                | 17                |
| SIPPER              | ZRANK2              | 56    | 68    | 76           | 28              | 8                 | 20                |
| SIPPER              | PISA                | 56    | 55    | 74           | 37              | 19                | 18                |
| SIPPER              | AP_T2               | 56    | 56    | 69           | 26              | 13                | 13                |
| SIPPER              | PYDOCK_TOT          | 56    | 54    | 69           | 28              | 15                | 13                |
| SIPPER              | FIREDOCK_AB         | 56    | 47    | 71           | 39              | 24                | 15                |
| SIPPER              | FIREDOCK            | 56    | 50    | 71           | 36              | 21                | 15                |
| SIPPER              | CP_SKOIP            | 56    | 56    | 73           | 34              | 17                | 17                |
| SIPPER              | CP_BFKV             | 56    | 54    | 69           | 28              | 15                | 13                |
| SIPPER              | FIREDOCK_EI         | 56    | 47    | 71           | 39              | 24                | 15                |
| SIPPER              | CP_DECK             | 56    | 55    | 74           | 37              | 19                | 18                |
| SIPPER              | AP_OPUS_PSP         | 56    | 60    | 75           | 34              | 15                | 19                |
| SIPPER              | ZRANK               | 56    | 43    | 69           | 39              | 26                | 13                |
| SIPPER              | CP_BT               | 56    | 46    | 67           | 32              | 21                | 11                |

Table continued on next page



Table continued from previous page

| Method A    | Method B            | $ A $ | $ B $ | $ A \cup B $ | $ A \ominus B $ | $ A \setminus B $ | $ B \setminus A $ |
|-------------|---------------------|-------|-------|--------------|-----------------|-------------------|-------------------|
| SIPPER      | CP_TSC              | 56    | 58    | 75           | 36              | 17                | 19                |
| SIPPER      | CP_RMFCA            | 56    | 40    | 64           | 32              | 24                | 8                 |
| SIPPER      | CP_TEI              | 56    | 50    | 71           | 36              | 21                | 15                |
| SIPPER      | CP_TD               | 56    | 49    | 69           | 33              | 20                | 13                |
| SIPPER      | CP_MJ3h             | 56    | 60    | 73           | 30              | 13                | 17                |
| SIPPER      | AP_DARS             | 56    | 49    | 73           | 41              | 24                | 17                |
| SIPPER      | CP_SKO <sub>b</sub> | 56    | 51    | 68           | 29              | 17                | 12                |
| SIPPER      | CP_TB               | 56    | 50    | 67           | 28              | 17                | 11                |
| SIPPER      | SPIDER              | 56    | 41    | 71           | 45              | 30                | 15                |
| AP_DCOMPLEX | AP_T1               | 37    | 54    | 57           | 23              | 3                 | 20                |
| AP_DCOMPLEX | ZRANK2              | 37    | 68    | 69           | 33              | 1                 | 32                |
| AP_DCOMPLEX | PISA                | 37    | 55    | 59           | 26              | 4                 | 22                |
| AP_DCOMPLEX | AP_T2               | 37    | 56    | 61           | 29              | 5                 | 24                |
| AP_DCOMPLEX | PYDOCK_TOT          | 37    | 54    | 64           | 37              | 10                | 27                |
| AP_DCOMPLEX | FIREDOCK_AB         | 37    | 47    | 53           | 22              | 6                 | 16                |
| AP_DCOMPLEX | FIREDOCK            | 37    | 50    | 57           | 27              | 7                 | 20                |
| AP_DCOMPLEX | CP_SKOIP            | 37    | 56    | 67           | 41              | 11                | 30                |
| AP_DCOMPLEX | CP_BFKV             | 37    | 54    | 70           | 49              | 16                | 33                |
| AP_DCOMPLEX | FIREDOCK_EI         | 37    | 47    | 56           | 28              | 9                 | 19                |
| AP_DCOMPLEX | CP_DECK             | 37    | 55    | 67           | 42              | 12                | 30                |
| AP_DCOMPLEX | AP_OPUS_PSP         | 37    | 60    | 64           | 31              | 4                 | 27                |
| AP_DCOMPLEX | ZRANK               | 37    | 43    | 48           | 16              | 5                 | 11                |
| AP_DCOMPLEX | CP_BT               | 37    | 46    | 58           | 33              | 12                | 21                |
| AP_DCOMPLEX | CP_TSC              | 37    | 58    | 61           | 27              | 3                 | 24                |
| AP_DCOMPLEX | CP_RMFCA            | 37    | 40    | 49           | 21              | 9                 | 12                |
| AP_DCOMPLEX | CP_TEI              | 37    | 50    | 62           | 37              | 12                | 25                |
| AP_DCOMPLEX | CP_TD               | 37    | 49    | 61           | 36              | 12                | 24                |
| AP_DCOMPLEX | CP_MJ3h             | 37    | 60    | 68           | 39              | 8                 | 31                |
| AP_DCOMPLEX | AP_DARS             | 37    | 49    | 65           | 44              | 16                | 28                |
| AP_DCOMPLEX | CP_SKO <sub>b</sub> | 37    | 51    | 67           | 46              | 16                | 30                |
| AP_DCOMPLEX | CP_TB               | 37    | 50    | 59           | 31              | 9                 | 22                |
| AP_DCOMPLEX | SPIDER              | 37    | 41    | 53           | 28              | 12                | 16                |
| AP_DCOMPLEX | SIPPER              | 37    | 56    | 69           | 45              | 13                | 32                |
| CP_Qp       | AP_T1               | 49    | 54    | 68           | 33              | 14                | 19                |
| CP_Qp       | ZRANK2              | 49    | 68    | 72           | 27              | 4                 | 23                |
| CP_Qp       | PISA                | 49    | 55    | 66           | 28              | 11                | 17                |
| CP_Qp       | AP_T2               | 49    | 56    | 69           | 33              | 13                | 20                |
| CP_Qp       | PYDOCK_TOT          | 49    | 54    | 70           | 37              | 16                | 21                |
| CP_Qp       | FIREDOCK_AB         | 49    | 47    | 63           | 30              | 16                | 14                |
| CP_Qp       | FIREDOCK            | 49    | 50    | 67           | 35              | 17                | 18                |
| CP_Qp       | CP_SKOIP            | 49    | 56    | 68           | 31              | 12                | 19                |
| CP_Qp       | CP_BFKV             | 49    | 54    | 69           | 35              | 15                | 20                |
| CP_Qp       | FIREDOCK_EI         | 49    | 47    | 65           | 34              | 18                | 16                |
| CP_Qp       | CP_DECK             | 49    | 55    | 69           | 34              | 14                | 20                |
| CP_Qp       | AP_OPUS_PSP         | 49    | 60    | 65           | 21              | 5                 | 16                |
| CP_Qp       | ZRANK               | 49    | 43    | 61           | 30              | 18                | 12                |
| CP_Qp       | CP_BT               | 49    | 46    | 64           | 33              | 18                | 15                |
| CP_Qp       | CP_TSC              | 49    | 58    | 67           | 27              | 9                 | 18                |
| CP_Qp       | CP_RMFCA            | 49    | 40    | 59           | 29              | 19                | 10                |
| CP_Qp       | CP_TEI              | 49    | 50    | 64           | 29              | 14                | 15                |
| CP_Qp       | CP_TD               | 49    | 49    | 63           | 28              | 14                | 14                |
| CP_Qp       | CP_MJ3h             | 49    | 60    | 69           | 29              | 9                 | 20                |
| CP_Qp       | AP_DARS             | 49    | 49    | 70           | 42              | 21                | 21                |
| CP_Qp       | CP_SKO <sub>b</sub> | 49    | 51    | 63           | 26              | 12                | 14                |
| CP_Qp       | CP_TB               | 49    | 50    | 62           | 25              | 12                | 13                |
| CP_Qp       | SPIDER              | 49    | 41    | 67           | 44              | 26                | 18                |
| CP_Qp       | SIPPER              | 49    | 56    | 69           | 33              | 13                | 20                |
| CP_Qp       | AP_DCOMPLEX         | 49    | 37    | 57           | 28              | 20                | 8                 |
| CP_HLPL     | AP_T1               | 52    | 54    | 68           | 30              | 14                | 16                |
| CP_HLPL     | ZRANK2              | 52    | 68    | 71           | 22              | 3                 | 19                |
| CP_HLPL     | PISA                | 52    | 55    | 66           | 25              | 11                | 14                |
| CP_HLPL     | AP_T2               | 52    | 56    | 68           | 28              | 12                | 16                |
| CP_HLPL     | PYDOCK_TOT          | 52    | 54    | 69           | 32              | 15                | 17                |
| CP_HLPL     | FIREDOCK_AB         | 52    | 47    | 62           | 25              | 15                | 10                |
| CP_HLPL     | FIREDOCK            | 52    | 50    | 66           | 30              | 16                | 14                |
| CP_HLPL     | CP_SKOIP            | 52    | 56    | 68           | 28              | 12                | 16                |
| CP_HLPL     | CP_BFKV             | 52    | 54    | 70           | 34              | 16                | 18                |
| CP_HLPL     | FIREDOCK_EI         | 52    | 47    | 65           | 31              | 18                | 13                |

Table continued on next page

Table continued from previous page

| Method A       | Method B    | $ A $ | $ B $ | $ A \cup B $ | $ A \ominus B $ | $ A \setminus B $ | $ B \setminus A $ |
|----------------|-------------|-------|-------|--------------|-----------------|-------------------|-------------------|
| CP_HLPL        | CP_DECK     | 52    | 55    | 69           | 31              | 14                | 17                |
| CP_HLPL        | AP_OPUS_PSP | 52    | 60    | 64           | 16              | 4                 | 12                |
| CP_HLPL        | ZRANK       | 52    | 43    | 62           | 29              | 19                | 10                |
| CP_HLPL        | CP_BT       | 52    | 46    | 63           | 28              | 17                | 11                |
| CP_HLPL        | CP_TSC      | 52    | 58    | 68           | 26              | 10                | 16                |
| CP_HLPL        | CP_RMFCFA   | 52    | 40    | 58           | 24              | 18                | 6                 |
| CP_HLPL        | CP_TEI      | 52    | 50    | 66           | 30              | 16                | 14                |
| CP_HLPL        | CP_TD       | 52    | 49    | 63           | 25              | 14                | 11                |
| CP_HLPL        | CP_MJ3h     | 52    | 60    | 68           | 24              | 8                 | 16                |
| CP_HLPL        | AP_DARS     | 52    | 49    | 70           | 39              | 21                | 18                |
| CP_HLPL        | CP_SKOb     | 52    | 51    | 66           | 29              | 15                | 14                |
| CP_HLPL        | CP_TB       | 52    | 50    | 60           | 18              | 10                | 8                 |
| CP_HLPL        | SPIDER      | 52    | 41    | 67           | 41              | 26                | 15                |
| CP_HLPL        | SIPPER      | 52    | 56    | 67           | 26              | 11                | 15                |
| CP_HLPL        | AP_DCOMPLEX | 52    | 37    | 59           | 29              | 22                | 7                 |
| CP_HLPL        | CP_Qp       | 52    | 49    | 55           | 9               | 6                 | 3                 |
| CHARMM.ELE     | AP_T1       | 39    | 54    | 67           | 41              | 13                | 28                |
| CHARMM.ELE     | ZRANK2      | 39    | 68    | 76           | 45              | 8                 | 37                |
| CHARMM.ELE     | PISA        | 39    | 55    | 67           | 40              | 12                | 28                |
| CHARMM.ELE     | AP_T2       | 39    | 56    | 66           | 37              | 10                | 27                |
| CHARMM.ELE     | PYDOCK_TOT  | 39    | 54    | 70           | 47              | 16                | 31                |
| CHARMM.ELE     | FIREDOCK_AB | 39    | 47    | 61           | 36              | 14                | 22                |
| CHARMM.ELE     | FIREDOCK    | 39    | 50    | 66           | 43              | 16                | 27                |
| CHARMM.ELE     | CP_SKOIP    | 39    | 56    | 76           | 57              | 20                | 37                |
| CHARMM.ELE     | CP_BFKV     | 39    | 54    | 68           | 43              | 14                | 29                |
| CHARMM.ELE     | FIREDOCK_EI | 39    | 47    | 66           | 46              | 19                | 27                |
| CHARMM.ELE     | CP_DECK     | 39    | 55    | 72           | 50              | 17                | 33                |
| CHARMM.ELE     | AP_OPUS_PSP | 39    | 60    | 74           | 49              | 14                | 35                |
| CHARMM.ELE     | ZRANK       | 39    | 43    | 57           | 32              | 14                | 18                |
| CHARMM.ELE     | CP_BT       | 39    | 46    | 62           | 39              | 16                | 23                |
| CHARMM.ELE     | CP_TSC      | 39    | 58    | 71           | 45              | 13                | 32                |
| CHARMM.ELE     | CP_RMFCFA   | 39    | 40    | 60           | 41              | 20                | 21                |
| CHARMM.ELE     | CP_TEI      | 39    | 50    | 67           | 45              | 17                | 28                |
| CHARMM.ELE     | CP_TD       | 39    | 49    | 68           | 48              | 19                | 29                |
| CHARMM.ELE     | CP_MJ3h     | 39    | 60    | 76           | 53              | 16                | 37                |
| CHARMM.ELE     | AP_DARS     | 39    | 49    | 73           | 58              | 24                | 34                |
| CHARMM.ELE     | CP_SKOb     | 39    | 51    | 65           | 40              | 14                | 26                |
| CHARMM.ELE     | CP_TB       | 39    | 50    | 66           | 43              | 16                | 27                |
| CHARMM.ELE     | SPIDER      | 39    | 41    | 62           | 44              | 21                | 23                |
| CHARMM.ELE     | SIPPER      | 39    | 56    | 72           | 49              | 16                | 33                |
| CHARMM.ELE     | AP_DCOMPLEX | 39    | 37    | 58           | 40              | 21                | 19                |
| CHARMM.ELE     | CP_Qp       | 39    | 49    | 66           | 44              | 17                | 27                |
| CHARMM.ELE     | CP_HLPL     | 39    | 52    | 69           | 47              | 17                | 30                |
| CP_MIXRANK_MIN | AP_T1       | 42    | 54    | 67           | 38              | 13                | 25                |
| CP_MIXRANK_MIN | ZRANK2      | 42    | 68    | 76           | 42              | 8                 | 34                |
| CP_MIXRANK_MIN | PISA        | 42    | 55    | 68           | 39              | 13                | 26                |
| CP_MIXRANK_MIN | AP_T2       | 42    | 56    | 69           | 40              | 13                | 27                |
| CP_MIXRANK_MIN | PYDOCK_TOT  | 42    | 54    | 72           | 48              | 18                | 30                |
| CP_MIXRANK_MIN | FIREDOCK_AB | 42    | 47    | 66           | 43              | 19                | 24                |
| CP_MIXRANK_MIN | FIREDOCK    | 42    | 50    | 67           | 42              | 17                | 25                |
| CP_MIXRANK_MIN | CP_SKOIP    | 42    | 56    | 68           | 38              | 12                | 26                |
| CP_MIXRANK_MIN | CP_BFKV     | 42    | 54    | 66           | 36              | 12                | 24                |
| CP_MIXRANK_MIN | FIREDOCK_EI | 42    | 47    | 66           | 43              | 19                | 24                |
| CP_MIXRANK_MIN | CP_DECK     | 42    | 55    | 68           | 39              | 13                | 26                |
| CP_MIXRANK_MIN | AP_OPUS_PSP | 42    | 60    | 73           | 44              | 13                | 31                |
| CP_MIXRANK_MIN | ZRANK       | 42    | 43    | 64           | 43              | 21                | 22                |
| CP_MIXRANK_MIN | CP_BT       | 42    | 46    | 62           | 36              | 16                | 20                |
| CP_MIXRANK_MIN | CP_TSC      | 42    | 58    | 72           | 44              | 14                | 30                |
| CP_MIXRANK_MIN | CP_RMFCFA   | 42    | 40    | 61           | 40              | 21                | 19                |
| CP_MIXRANK_MIN | CP_TEI      | 42    | 50    | 64           | 36              | 14                | 22                |
| CP_MIXRANK_MIN | CP_TD       | 42    | 49    | 61           | 31              | 12                | 19                |
| CP_MIXRANK_MIN | CP_MJ3h     | 42    | 60    | 68           | 34              | 8                 | 26                |
| CP_MIXRANK_MIN | AP_DARS     | 42    | 49    | 69           | 47              | 20                | 27                |
| CP_MIXRANK_MIN | CP_SKOb     | 42    | 51    | 64           | 35              | 13                | 22                |
| CP_MIXRANK_MIN | CP_TB       | 42    | 50    | 65           | 38              | 15                | 23                |
| CP_MIXRANK_MIN | SPIDER      | 42    | 41    | 63           | 43              | 22                | 21                |
| CP_MIXRANK_MIN | SIPPER      | 42    | 56    | 67           | 36              | 11                | 25                |
| CP_MIXRANK_MIN | AP_DCOMPLEX | 42    | 37    | 59           | 39              | 22                | 17                |

Table continued on next page

Table continued from previous page

| Method A       | Method B       | $ A $ | $ B $ | $ A \cup B $ | $ A \ominus B $ | $ A \setminus B $ | $ B \setminus A $ |
|----------------|----------------|-------|-------|--------------|-----------------|-------------------|-------------------|
| CP_MIXRANK_MIN | CP_Qp          | 42    | 49    | 61           | 31              | 12                | 19                |
| CP_MIXRANK_MIN | CP_HLPL        | 42    | 52    | 63           | 32              | 11                | 21                |
| CP_MIXRANK_MIN | CHARMM_ELE     | 42    | 39    | 63           | 45              | 24                | 21                |
| CP_ES3DC_MIN   | AP_T1          | 50    | 54    | 73           | 42              | 19                | 23                |
| CP_ES3DC_MIN   | ZRANK2         | 50    | 68    | 78           | 38              | 10                | 28                |
| CP_ES3DC_MIN   | PISA           | 50    | 55    | 73           | 41              | 18                | 23                |
| CP_ES3DC_MIN   | AP_T2          | 50    | 56    | 74           | 42              | 18                | 24                |
| CP_ES3DC_MIN   | PYDOCK_TOT     | 50    | 54    | 72           | 40              | 18                | 22                |
| CP_ES3DC_MIN   | FIREDOCK_AB    | 50    | 47    | 71           | 45              | 24                | 21                |
| CP_ES3DC_MIN   | FIREDOCK       | 50    | 50    | 74           | 48              | 24                | 24                |
| CP_ES3DC_MIN   | CP_SKOIP       | 50    | 56    | 72           | 38              | 16                | 22                |
| CP_ES3DC_MIN   | CP_BFKV        | 50    | 54    | 69           | 34              | 15                | 19                |
| CP_ES3DC_MIN   | FIREDOCK_EI    | 50    | 47    | 74           | 51              | 27                | 24                |
| CP_ES3DC_MIN   | CP_DECK        | 50    | 55    | 72           | 39              | 17                | 22                |
| CP_ES3DC_MIN   | AP_OPUS_PSP    | 50    | 60    | 74           | 38              | 14                | 24                |
| CP_ES3DC_MIN   | ZRANK          | 50    | 43    | 69           | 45              | 26                | 19                |
| CP_ES3DC_MIN   | CP_BT          | 50    | 46    | 66           | 36              | 20                | 16                |
| CP_ES3DC_MIN   | CP_TSC         | 50    | 58    | 74           | 40              | 16                | 24                |
| CP_ES3DC_MIN   | CP_RMFCA       | 50    | 40    | 66           | 42              | 26                | 16                |
| CP_ES3DC_MIN   | CP_TEI         | 50    | 50    | 71           | 42              | 21                | 21                |
| CP_ES3DC_MIN   | CP_TD          | 50    | 49    | 70           | 41              | 21                | 20                |
| CP_ES3DC_MIN   | CP_MJ3h        | 50    | 60    | 75           | 40              | 15                | 25                |
| CP_ES3DC_MIN   | AP_DARS        | 50    | 49    | 74           | 49              | 25                | 24                |
| CP_ES3DC_MIN   | CP_SKOb        | 50    | 51    | 65           | 29              | 14                | 15                |
| CP_ES3DC_MIN   | CP_TB          | 50    | 50    | 67           | 34              | 17                | 17                |
| CP_ES3DC_MIN   | SPIDER         | 50    | 41    | 74           | 57              | 33                | 24                |
| CP_ES3DC_MIN   | SIPPER         | 50    | 56    | 67           | 28              | 11                | 17                |
| CP_ES3DC_MIN   | AP_DCOMPLEX    | 50    | 37    | 67           | 47              | 30                | 17                |
| CP_ES3DC_MIN   | CP_Qp          | 50    | 49    | 65           | 31              | 16                | 15                |
| CP_ES3DC_MIN   | CP_HLPL        | 50    | 52    | 66           | 30              | 14                | 16                |
| CP_ES3DC_MIN   | CHARMM_ELE     | 50    | 39    | 66           | 43              | 27                | 16                |
| CP_ES3DC_MIN   | CP_MIXRANK_MIN | 50    | 42    | 58           | 24              | 16                | 8                 |
| CP_ZS3DC_MIN   | AP_T1          | 48    | 54    | 70           | 38              | 16                | 22                |
| CP_ZS3DC_MIN   | ZRANK2         | 48    | 68    | 76           | 36              | 8                 | 28                |
| CP_ZS3DC_MIN   | PISA           | 48    | 55    | 72           | 41              | 17                | 24                |
| CP_ZS3DC_MIN   | AP_T2          | 48    | 56    | 72           | 40              | 16                | 24                |
| CP_ZS3DC_MIN   | PYDOCK_TOT     | 48    | 54    | 69           | 36              | 15                | 21                |
| CP_ZS3DC_MIN   | FIREDOCK_AB    | 48    | 47    | 68           | 41              | 21                | 20                |
| CP_ZS3DC_MIN   | FIREDOCK       | 48    | 50    | 71           | 44              | 21                | 23                |
| CP_ZS3DC_MIN   | CP_SKOIP       | 48    | 56    | 71           | 38              | 15                | 23                |
| CP_ZS3DC_MIN   | CP_BFKV        | 48    | 54    | 67           | 32              | 13                | 19                |
| CP_ZS3DC_MIN   | FIREDOCK_EI    | 48    | 47    | 71           | 47              | 24                | 23                |
| CP_ZS3DC_MIN   | CP_DECK        | 48    | 55    | 72           | 41              | 17                | 24                |
| CP_ZS3DC_MIN   | AP_OPUS_PSP    | 48    | 60    | 73           | 38              | 13                | 25                |
| CP_ZS3DC_MIN   | ZRANK          | 48    | 43    | 66           | 41              | 23                | 18                |
| CP_ZS3DC_MIN   | CP_BT          | 48    | 46    | 63           | 32              | 17                | 15                |
| CP_ZS3DC_MIN   | CP_TSC         | 48    | 58    | 72           | 38              | 14                | 24                |
| CP_ZS3DC_MIN   | CP_RMFCA       | 48    | 40    | 63           | 38              | 23                | 15                |
| CP_ZS3DC_MIN   | CP_TEI         | 48    | 50    | 68           | 38              | 18                | 20                |
| CP_ZS3DC_MIN   | CP_TD          | 48    | 49    | 68           | 39              | 19                | 20                |
| CP_ZS3DC_MIN   | CP_MJ3h        | 48    | 60    | 72           | 36              | 12                | 24                |
| CP_ZS3DC_MIN   | AP_DARS        | 48    | 49    | 72           | 47              | 23                | 24                |
| CP_ZS3DC_MIN   | CP_SKOb        | 48    | 51    | 64           | 29              | 13                | 16                |
| CP_ZS3DC_MIN   | CP_TB          | 48    | 50    | 64           | 30              | 14                | 16                |
| CP_ZS3DC_MIN   | SPIDER         | 48    | 41    | 71           | 53              | 30                | 23                |
| CP_ZS3DC_MIN   | SIPPER         | 48    | 56    | 66           | 28              | 10                | 18                |
| CP_ZS3DC_MIN   | AP_DCOMPLEX    | 48    | 37    | 64           | 43              | 27                | 16                |
| CP_ZS3DC_MIN   | CP_Qp          | 48    | 49    | 63           | 29              | 14                | 15                |
| CP_ZS3DC_MIN   | CP_HLPL        | 48    | 52    | 64           | 28              | 12                | 16                |
| CP_ZS3DC_MIN   | CHARMM_ELE     | 48    | 39    | 63           | 39              | 24                | 15                |
| CP_ZS3DC_MIN   | CP_MIXRANK_MIN | 48    | 42    | 56           | 22              | 14                | 8                 |
| CP_ZS3DC_MIN   | CP_ES3DC_MIN   | 48    | 50    | 51           | 4               | 1                 | 3                 |
| AP_dDFIRE      | AP_T1          | 33    | 54    | 56           | 25              | 2                 | 23                |
| AP_dDFIRE      | ZRANK2         | 33    | 68    | 68           | 35              | 0                 | 35                |
| AP_dDFIRE      | PISA           | 33    | 55    | 58           | 28              | 3                 | 25                |
| AP_dDFIRE      | AP_T2          | 33    | 56    | 59           | 29              | 3                 | 26                |
| AP_dDFIRE      | PYDOCK_TOT     | 33    | 54    | 61           | 35              | 7                 | 28                |
| AP_dDFIRE      | FIREDOCK_AB    | 33    | 47    | 52           | 24              | 5                 | 19                |

Table continued on next page

Table continued from previous page

| Method A   | Method B       | $ A $ | $ B $ | $ A \cup B $ | $ A \ominus B $ | $ A \setminus B $ | $ B \setminus A $ |
|------------|----------------|-------|-------|--------------|-----------------|-------------------|-------------------|
| AP_dDFIRE  | FIREDOCK       | 33    | 50    | 55           | 27              | 5                 | 22                |
| AP_dDFIRE  | CP_SKOIP       | 33    | 56    | 64           | 39              | 8                 | 31                |
| AP_dDFIRE  | CP_BFKV        | 33    | 54    | 66           | 45              | 12                | 33                |
| AP_dDFIRE  | FIREDOCK_EI    | 33    | 47    | 53           | 26              | 6                 | 20                |
| AP_dDFIRE  | CP_DECK        | 33    | 55    | 64           | 40              | 9                 | 31                |
| AP_dDFIRE  | AP_OPUS_PSP    | 33    | 60    | 61           | 29              | 1                 | 28                |
| AP_dDFIRE  | ZRANK          | 33    | 43    | 49           | 22              | 6                 | 16                |
| AP_dDFIRE  | CP_BT          | 33    | 46    | 54           | 29              | 8                 | 21                |
| AP_dDFIRE  | CP_TSC         | 33    | 58    | 62           | 33              | 4                 | 29                |
| AP_dDFIRE  | CP_RMFCFA      | 33    | 40    | 44           | 15              | 4                 | 11                |
| AP_dDFIRE  | CP_TEI         | 33    | 50    | 61           | 39              | 11                | 28                |
| AP_dDFIRE  | CP_TD          | 33    | 49    | 57           | 32              | 8                 | 24                |
| AP_dDFIRE  | CP_MJ3h        | 33    | 60    | 65           | 37              | 5                 | 32                |
| AP_dDFIRE  | AP_DARS        | 33    | 49    | 59           | 36              | 10                | 26                |
| AP_dDFIRE  | CP_SKOb        | 33    | 51    | 63           | 42              | 12                | 30                |
| AP_dDFIRE  | CP_TB          | 33    | 50    | 59           | 35              | 9                 | 26                |
| AP_dDFIRE  | SPIDER         | 33    | 41    | 50           | 26              | 9                 | 17                |
| AP_dDFIRE  | SIPPER         | 33    | 56    | 63           | 37              | 7                 | 30                |
| AP_dDFIRE  | AP_DCOMPLEX    | 33    | 37    | 42           | 14              | 5                 | 9                 |
| AP_dDFIRE  | CP_Qp          | 33    | 49    | 55           | 28              | 6                 | 22                |
| AP_dDFIRE  | CP_HLPL        | 33    | 52    | 55           | 25              | 3                 | 22                |
| AP_dDFIRE  | CHARMM_ELE     | 33    | 39    | 56           | 40              | 17                | 23                |
| AP_dDFIRE  | CP_MIXRANK_MIN | 33    | 42    | 56           | 37              | 14                | 23                |
| AP_dDFIRE  | CP_ES3DC_MIN   | 33    | 50    | 65           | 47              | 15                | 32                |
| AP_dDFIRE  | CP_ZS3DC_MIN   | 33    | 48    | 62           | 43              | 14                | 29                |
| CP_SKOa    | AP_T1          | 52    | 54    | 74           | 42              | 20                | 22                |
| CP_SKOa    | ZRANK2         | 52    | 68    | 79           | 38              | 11                | 27                |
| CP_SKOa    | PISA           | 52    | 55    | 71           | 35              | 16                | 19                |
| CP_SKOa    | AP_T2          | 52    | 56    | 73           | 38              | 17                | 21                |
| CP_SKOa    | PYDOCK_TOT     | 52    | 54    | 74           | 42              | 20                | 22                |
| CP_SKOa    | FIREDOCK_AB    | 52    | 47    | 74           | 49              | 27                | 22                |
| CP_SKOa    | FIREDOCK       | 52    | 50    | 76           | 50              | 26                | 24                |
| CP_SKOa    | CP_SKOIP       | 52    | 56    | 72           | 36              | 16                | 20                |
| CP_SKOa    | CP_BFKV        | 52    | 54    | 60           | 14              | 6                 | 8                 |
| CP_SKOa    | FIREDOCK_EI    | 52    | 47    | 74           | 49              | 27                | 22                |
| CP_SKOa    | CP_DECK        | 52    | 55    | 74           | 41              | 19                | 22                |
| CP_SKOa    | AP_OPUS_PSP    | 52    | 60    | 74           | 36              | 14                | 22                |
| CP_SKOa    | ZRANK          | 52    | 43    | 73           | 51              | 30                | 21                |
| CP_SKOa    | CP_BT          | 52    | 46    | 64           | 30              | 18                | 12                |
| CP_SKOa    | CP_TSC         | 52    | 58    | 76           | 42              | 18                | 24                |
| CP_SKOa    | CP_RMFCFA      | 52    | 40    | 66           | 40              | 26                | 14                |
| CP_SKOa    | CP_TEI         | 52    | 50    | 70           | 38              | 20                | 18                |
| CP_SKOa    | CP_TD          | 52    | 49    | 69           | 37              | 20                | 17                |
| CP_SKOa    | CP_MJ3h        | 52    | 60    | 74           | 36              | 14                | 22                |
| CP_SKOa    | AP_DARS        | 52    | 49    | 70           | 39              | 21                | 18                |
| CP_SKOa    | CP_SKOb        | 52    | 51    | 58           | 13              | 7                 | 6                 |
| CP_SKOa    | CP_TB          | 52    | 50    | 69           | 36              | 19                | 17                |
| CP_SKOa    | SPIDER         | 52    | 41    | 76           | 59              | 35                | 24                |
| CP_SKOa    | SIPPER         | 52    | 56    | 69           | 30              | 13                | 17                |
| CP_SKOa    | AP_DCOMPLEX    | 52    | 37    | 70           | 51              | 33                | 18                |
| CP_SKOa    | CP_Qp          | 52    | 49    | 66           | 31              | 17                | 14                |
| CP_SKOa    | CP_HLPL        | 52    | 52    | 68           | 32              | 16                | 16                |
| CP_SKOa    | CHARMM_ELE     | 52    | 39    | 69           | 47              | 30                | 17                |
| CP_SKOa    | CP_MIXRANK_MIN | 52    | 42    | 63           | 32              | 21                | 11                |
| CP_SKOa    | CP_ES3DC_MIN   | 52    | 50    | 64           | 26              | 14                | 12                |
| CP_SKOa    | CP_ZS3DC_MIN   | 52    | 48    | 64           | 28              | 16                | 12                |
| CP_SKOa    | AP_dDFIRE      | 52    | 33    | 67           | 49              | 34                | 15                |
| CHARMM_TOT | AP_T1          | 49    | 54    | 69           | 35              | 15                | 20                |
| CHARMM_TOT | ZRANK2         | 49    | 68    | 80           | 43              | 12                | 31                |
| CHARMM_TOT | PISA           | 49    | 55    | 74           | 44              | 19                | 25                |
| CHARMM_TOT | AP_T2          | 49    | 56    | 70           | 35              | 14                | 21                |
| CHARMM_TOT | PYDOCK_TOT     | 49    | 54    | 66           | 29              | 12                | 17                |
| CHARMM_TOT | FIREDOCK_AB    | 49    | 47    | 67           | 38              | 20                | 18                |
| CHARMM_TOT | FIREDOCK       | 49    | 50    | 66           | 33              | 16                | 17                |
| CHARMM_TOT | CP_SKOIP       | 49    | 56    | 71           | 37              | 15                | 22                |
| CHARMM_TOT | CP_BFKV        | 49    | 54    | 75           | 47              | 21                | 26                |
| CHARMM_TOT | FIREDOCK_EI    | 49    | 47    | 66           | 36              | 19                | 17                |
| CHARMM_TOT | CP_DECK        | 49    | 55    | 70           | 36              | 15                | 21                |

Table continued on next page

Table continued from previous page

| Method A    | Method B       | $ A $ | $ B $ | $ A \cup B $ | $ A \ominus B $ | $ A \setminus B $ | $ B \setminus A $ |
|-------------|----------------|-------|-------|--------------|-----------------|-------------------|-------------------|
| CHARMM.TOT  | AP_OPUS.PSP    | 49    | 60    | 75           | 41              | 15                | 26                |
| CHARMM.TOT  | ZRANK          | 49    | 43    | 66           | 40              | 23                | 17                |
| CHARMM.TOT  | CP_BT          | 49    | 46    | 67           | 39              | 21                | 18                |
| CHARMM.TOT  | CP_TSC         | 49    | 58    | 75           | 43              | 17                | 26                |
| CHARMM.TOT  | CP_RMFCa       | 49    | 40    | 63           | 37              | 23                | 14                |
| CHARMM.TOT  | CP_TEl         | 49    | 50    | 70           | 41              | 20                | 21                |
| CHARMM.TOT  | CP_TD          | 49    | 49    | 69           | 40              | 20                | 20                |
| CHARMM.TOT  | CP_MJ3h        | 49    | 60    | 71           | 33              | 11                | 22                |
| CHARMM.TOT  | AP_DARS        | 49    | 49    | 67           | 36              | 18                | 18                |
| CHARMM.TOT  | CP_SKOb        | 49    | 51    | 71           | 42              | 20                | 22                |
| CHARMM.TOT  | CP_TB          | 49    | 50    | 69           | 39              | 19                | 20                |
| CHARMM.TOT  | SPIDER         | 49    | 41    | 69           | 48              | 28                | 20                |
| CHARMM.TOT  | SIPPER         | 49    | 56    | 75           | 45              | 19                | 26                |
| CHARMM.TOT  | AP_DCOMPLEX    | 49    | 37    | 63           | 40              | 26                | 14                |
| CHARMM.TOT  | CP_Qp          | 49    | 49    | 71           | 44              | 22                | 22                |
| CHARMM.TOT  | CP_HLPL        | 49    | 52    | 73           | 45              | 21                | 24                |
| CHARMM.TOT  | CHARMM.ELE     | 49    | 39    | 68           | 48              | 29                | 19                |
| CHARMM.TOT  | CP_MIXRANK_MIN | 49    | 42    | 68           | 45              | 26                | 19                |
| CHARMM.TOT  | CP_ES3DC_MIN   | 49    | 50    | 72           | 45              | 22                | 23                |
| CHARMM.TOT  | CP_ZS3DC_MIN   | 49    | 48    | 71           | 45              | 23                | 22                |
| CHARMM.TOT  | AP_dDFIRE      | 49    | 33    | 62           | 42              | 29                | 13                |
| CHARMM.TOT  | CP_SKOa        | 49    | 52    | 73           | 45              | 21                | 24                |
| ROSETTADOCK | AP_T1          | 41    | 54    | 59           | 23              | 5                 | 18                |
| ROSETTADOCK | ZRANK2         | 41    | 68    | 70           | 31              | 2                 | 29                |
| ROSETTADOCK | PISA           | 41    | 55    | 63           | 30              | 8                 | 22                |
| ROSETTADOCK | AP_T2          | 41    | 56    | 63           | 29              | 7                 | 22                |
| ROSETTADOCK | PYDOCK_TOT     | 41    | 54    | 64           | 33              | 10                | 23                |
| ROSETTADOCK | FIREDOCK_AB    | 41    | 47    | 56           | 24              | 9                 | 15                |
| ROSETTADOCK | FIREDOCK       | 41    | 50    | 59           | 27              | 9                 | 18                |
| ROSETTADOCK | CP_SKOIP       | 41    | 56    | 67           | 37              | 11                | 26                |
| ROSETTADOCK | CP_BFKV        | 41    | 54    | 70           | 45              | 16                | 29                |
| ROSETTADOCK | FIREDOCK_EI    | 41    | 47    | 56           | 24              | 9                 | 15                |
| ROSETTADOCK | CP_DECK        | 41    | 55    | 70           | 44              | 15                | 29                |
| ROSETTADOCK | AP_OPUS.PSP    | 41    | 60    | 65           | 29              | 5                 | 24                |
| ROSETTADOCK | ZRANK          | 41    | 43    | 52           | 20              | 9                 | 11                |
| ROSETTADOCK | CP_BT          | 41    | 46    | 62           | 37              | 16                | 21                |
| ROSETTADOCK | CP_TSC         | 41    | 58    | 65           | 31              | 7                 | 24                |
| ROSETTADOCK | CP_RMFCa       | 41    | 40    | 49           | 17              | 9                 | 8                 |
| ROSETTADOCK | CP_TEl         | 41    | 50    | 64           | 37              | 14                | 23                |
| ROSETTADOCK | CP_TD          | 41    | 49    | 66           | 42              | 17                | 25                |
| ROSETTADOCK | CP_MJ3h        | 41    | 60    | 70           | 39              | 10                | 29                |
| ROSETTADOCK | AP_DARS        | 41    | 49    | 64           | 38              | 15                | 23                |
| ROSETTADOCK | CP_SKOb        | 41    | 51    | 68           | 44              | 17                | 27                |
| ROSETTADOCK | CP_TB          | 41    | 50    | 61           | 31              | 11                | 20                |
| ROSETTADOCK | SPIDER         | 41    | 41    | 57           | 32              | 16                | 16                |
| ROSETTADOCK | SIPPER         | 41    | 56    | 69           | 41              | 13                | 28                |
| ROSETTADOCK | AP_DCOMPLEX    | 41    | 37    | 48           | 18              | 11                | 7                 |
| ROSETTADOCK | CP_Qp          | 41    | 49    | 61           | 32              | 12                | 20                |
| ROSETTADOCK | CP_HLPL        | 41    | 52    | 62           | 31              | 10                | 21                |
| ROSETTADOCK | CHARMM.ELE     | 41    | 39    | 62           | 44              | 23                | 21                |
| ROSETTADOCK | CP_MIXRANK_MIN | 41    | 42    | 62           | 41              | 20                | 21                |
| ROSETTADOCK | CP_ES3DC_MIN   | 41    | 50    | 68           | 45              | 18                | 27                |
| ROSETTADOCK | CP_ZS3DC_MIN   | 41    | 48    | 65           | 41              | 17                | 24                |
| ROSETTADOCK | AP_dDFIRE      | 41    | 33    | 46           | 18              | 13                | 5                 |
| ROSETTADOCK | CP_SKOa        | 41    | 52    | 70           | 47              | 18                | 29                |
| ROSETTADOCK | CHARMM.TOT     | 41    | 49    | 65           | 40              | 16                | 24                |
| ATTRACT     | AP_T1          | 38    | 54    | 57           | 22              | 3                 | 19                |
| ATTRACT     | ZRANK2         | 38    | 68    | 69           | 32              | 1                 | 31                |
| ATTRACT     | PISA           | 38    | 55    | 59           | 25              | 4                 | 21                |
| ATTRACT     | AP_T2          | 38    | 56    | 60           | 26              | 4                 | 22                |
| ATTRACT     | PYDOCK_TOT     | 38    | 54    | 64           | 36              | 10                | 26                |
| ATTRACT     | FIREDOCK_AB    | 38    | 47    | 53           | 21              | 6                 | 15                |
| ATTRACT     | FIREDOCK       | 38    | 50    | 58           | 28              | 8                 | 20                |
| ATTRACT     | CP_SKOIP       | 38    | 56    | 68           | 42              | 12                | 30                |
| ATTRACT     | CP_BFKV        | 38    | 54    | 68           | 44              | 14                | 30                |
| ATTRACT     | FIREDOCK_EI    | 38    | 47    | 56           | 27              | 9                 | 18                |
| ATTRACT     | CP_DECK        | 38    | 55    | 68           | 43              | 13                | 30                |
| ATTRACT     | AP_OPUS.PSP    | 38    | 60    | 64           | 30              | 4                 | 26                |

Table continued on next page

Table continued from previous page

| Method A | Method B       | $ A $ | $ B $ | $ A \cup B $ | $ A \ominus B $ | $ A \setminus B $ | $ B \setminus A $ |
|----------|----------------|-------|-------|--------------|-----------------|-------------------|-------------------|
| ATTRACT  | ZRANK          | 38    | 43    | 50           | 19              | 7                 | 12                |
| ATTRACT  | CP_BT          | 38    | 46    | 58           | 32              | 12                | 20                |
| ATTRACT  | CP_TSC         | 38    | 58    | 63           | 30              | 5                 | 25                |
| ATTRACT  | CP_RMFCFA      | 38    | 40    | 49           | 20              | 9                 | 11                |
| ATTRACT  | CP_TEL         | 38    | 50    | 61           | 34              | 11                | 23                |
| ATTRACT  | CP_TD          | 38    | 49    | 61           | 35              | 12                | 23                |
| ATTRACT  | CP_MJ3h        | 38    | 60    | 68           | 38              | 8                 | 30                |
| ATTRACT  | AP_DARS        | 38    | 49    | 66           | 45              | 17                | 28                |
| ATTRACT  | CP_SKOb        | 38    | 51    | 66           | 43              | 15                | 28                |
| ATTRACT  | CP_TB          | 38    | 50    | 59           | 30              | 9                 | 21                |
| ATTRACT  | SPIDER         | 38    | 41    | 55           | 31              | 14                | 17                |
| ATTRACT  | SIPPER         | 38    | 56    | 67           | 40              | 11                | 29                |
| ATTRACT  | AP_DCOMPLEX    | 38    | 37    | 42           | 9               | 5                 | 4                 |
| ATTRACT  | CP_Qp          | 38    | 49    | 57           | 27              | 8                 | 19                |
| ATTRACT  | CP_HLPL        | 38    | 52    | 59           | 28              | 7                 | 21                |
| ATTRACT  | CHARMM_ELE     | 38    | 39    | 57           | 37              | 18                | 19                |
| ATTRACT  | CP_MIXRANK_MIN | 38    | 42    | 57           | 34              | 15                | 19                |
| ATTRACT  | CP_ES3DC_MIN   | 38    | 50    | 65           | 42              | 15                | 27                |
| ATTRACT  | CP_ZS3DC_MIN   | 38    | 48    | 62           | 38              | 14                | 24                |
| ATTRACT  | AP_dDFIRE      | 38    | 33    | 43           | 15              | 10                | 5                 |
| ATTRACT  | CP_SKOa        | 38    | 52    | 69           | 48              | 17                | 31                |
| ATTRACT  | CHARMM_TOT     | 38    | 49    | 64           | 41              | 15                | 26                |
| ATTRACT  | ROSETTADOCK    | 38    | 41    | 49           | 19              | 8                 | 11                |
| PROPNSTS | AP_T1          | 51    | 54    | 74           | 43              | 20                | 23                |
| PROPNSTS | ZRANK2         | 51    | 68    | 76           | 33              | 8                 | 25                |
| PROPNSTS | PISA           | 51    | 55    | 73           | 40              | 18                | 22                |
| PROPNSTS | AP_T2          | 51    | 56    | 74           | 41              | 18                | 23                |
| PROPNSTS | PYDOCK_TOT     | 51    | 54    | 71           | 37              | 17                | 20                |
| PROPNSTS | FIREDOCK_AB    | 51    | 47    | 73           | 48              | 26                | 22                |
| PROPNSTS | FIREDOCK       | 51    | 50    | 74           | 47              | 24                | 23                |
| PROPNSTS | CP_SKOIP       | 51    | 56    | 71           | 35              | 15                | 20                |
| PROPNSTS | CP_BFKV        | 51    | 54    | 67           | 29              | 13                | 16                |
| PROPNSTS | FIREDOCK_EI    | 51    | 47    | 73           | 48              | 26                | 22                |
| PROPNSTS | CP_DECK        | 51    | 55    | 73           | 40              | 18                | 22                |
| PROPNSTS | AP_OPUS_PSP    | 51    | 60    | 74           | 37              | 14                | 23                |
| PROPNSTS | ZRANK          | 51    | 43    | 72           | 50              | 29                | 21                |
| PROPNSTS | CP_BT          | 51    | 46    | 67           | 37              | 21                | 16                |
| PROPNSTS | CP_TSC         | 51    | 58    | 75           | 41              | 17                | 24                |
| PROPNSTS | CP_RMFCFA      | 51    | 40    | 66           | 41              | 26                | 15                |
| PROPNSTS | CP_TEL         | 51    | 50    | 68           | 35              | 18                | 17                |
| PROPNSTS | CP_TD          | 51    | 49    | 70           | 40              | 21                | 19                |
| PROPNSTS | CP_MJ3h        | 51    | 60    | 72           | 33              | 12                | 21                |
| PROPNSTS | AP_DARS        | 51    | 49    | 72           | 44              | 23                | 21                |
| PROPNSTS | CP_SKOb        | 51    | 51    | 63           | 24              | 12                | 12                |
| PROPNSTS | CP_TB          | 51    | 50    | 67           | 33              | 17                | 16                |
| PROPNSTS | SPIDER         | 51    | 41    | 77           | 62              | 36                | 26                |
| PROPNSTS | SIPPER         | 51    | 56    | 66           | 25              | 10                | 15                |
| PROPNSTS | AP_DCOMPLEX    | 51    | 37    | 71           | 54              | 34                | 20                |
| PROPNSTS | CP_Qp          | 51    | 49    | 65           | 30              | 16                | 14                |
| PROPNSTS | CP_HLPL        | 51    | 52    | 66           | 29              | 14                | 15                |
| PROPNSTS | CHARMM_ELE     | 51    | 39    | 68           | 46              | 29                | 17                |
| PROPNSTS | CP_MIXRANK_MIN | 51    | 42    | 66           | 39              | 24                | 15                |
| PROPNSTS | CP_ES3DC_MIN   | 51    | 50    | 65           | 29              | 15                | 14                |
| PROPNSTS | CP_ZS3DC_MIN   | 51    | 48    | 64           | 29              | 16                | 13                |
| PROPNSTS | AP_dDFIRE      | 51    | 33    | 67           | 50              | 34                | 16                |
| PROPNSTS | CP_SKOa        | 51    | 52    | 63           | 23              | 11                | 12                |
| PROPNSTS | CHARMM_TOT     | 51    | 49    | 74           | 48              | 25                | 23                |
| PROPNSTS | ROSETTADOCK    | 51    | 41    | 72           | 52              | 31                | 21                |
| PROPNSTS | ATTRACT        | 51    | 38    | 69           | 49              | 31                | 18                |
| DESOLV   | AP_T1          | 46    | 54    | 70           | 40              | 16                | 24                |
| DESOLV   | ZRANK2         | 46    | 68    | 74           | 34              | 6                 | 28                |
| DESOLV   | PISA           | 46    | 55    | 71           | 41              | 16                | 25                |
| DESOLV   | AP_T2          | 46    | 56    | 70           | 38              | 14                | 24                |
| DESOLV   | PYDOCK_TOT     | 46    | 54    | 63           | 26              | 9                 | 17                |
| DESOLV   | FIREDOCK_AB    | 46    | 47    | 68           | 43              | 21                | 22                |
| DESOLV   | FIREDOCK       | 46    | 50    | 67           | 38              | 17                | 21                |
| DESOLV   | CP_SKOIP       | 46    | 56    | 66           | 30              | 10                | 20                |
| DESOLV   | CP_BFKV        | 46    | 54    | 72           | 44              | 18                | 26                |

Table continued on next page

Table continued from previous page

| Method A     | Method B       | $ A $ | $ B $ | $ A \cup B $ | $ A \ominus B $ | $ A \setminus B $ | $ B \setminus A $ |
|--------------|----------------|-------|-------|--------------|-----------------|-------------------|-------------------|
| DESOLV       | FIREDOCK_EI    | 46    | 47    | 66           | 39              | 19                | 20                |
| DESOLV       | CP_DECK        | 46    | 55    | 67           | 33              | 12                | 21                |
| DESOLV       | AP_OPUS_PSP    | 46    | 60    | 69           | 32              | 9                 | 23                |
| DESOLV       | ZRANK          | 46    | 43    | 67           | 45              | 24                | 21                |
| DESOLV       | CP_BT          | 46    | 46    | 66           | 40              | 20                | 20                |
| DESOLV       | CP_TSC         | 46    | 58    | 71           | 38              | 13                | 25                |
| DESOLV       | CP_RMFCFA      | 46    | 40    | 61           | 36              | 21                | 15                |
| DESOLV       | CP_TEI         | 46    | 50    | 67           | 38              | 17                | 21                |
| DESOLV       | CP_TD          | 46    | 49    | 66           | 37              | 17                | 20                |
| DESOLV       | CP_MJ3h        | 46    | 60    | 69           | 32              | 9                 | 23                |
| DESOLV       | AP_DARS        | 46    | 49    | 59           | 23              | 10                | 13                |
| DESOLV       | CP_SKOb        | 46    | 51    | 66           | 35              | 15                | 20                |
| DESOLV       | CP_TB          | 46    | 50    | 66           | 36              | 16                | 20                |
| DESOLV       | SPIDER         | 46    | 41    | 67           | 47              | 26                | 21                |
| DESOLV       | SIPPER         | 46    | 56    | 68           | 34              | 12                | 22                |
| DESOLV       | AP_DCOMPLEX    | 46    | 37    | 62           | 41              | 25                | 16                |
| DESOLV       | CP_Qp          | 46    | 49    | 66           | 37              | 17                | 20                |
| DESOLV       | CP_HLPL        | 46    | 52    | 67           | 36              | 15                | 21                |
| DESOLV       | CHARMM_ELE     | 46    | 39    | 69           | 53              | 30                | 23                |
| DESOLV       | CP_MIXRANK_MIN | 46    | 42    | 66           | 44              | 24                | 20                |
| DESOLV       | CP_ES3DC_MIN   | 46    | 50    | 66           | 36              | 16                | 20                |
| DESOLV       | CP_ZS3DC_MIN   | 46    | 48    | 65           | 36              | 17                | 19                |
| DESOLV       | AP_dDFIRE      | 46    | 33    | 59           | 39              | 26                | 13                |
| DESOLV       | CP_SKOa        | 46    | 52    | 66           | 34              | 14                | 20                |
| DESOLV       | CHARMM_TOT     | 46    | 49    | 60           | 25              | 11                | 14                |
| DESOLV       | ROSETTADOCK    | 46    | 41    | 63           | 39              | 22                | 17                |
| DESOLV       | ATTRACT        | 46    | 38    | 64           | 44              | 26                | 18                |
| DESOLV       | PROP NSTS      | 46    | 51    | 68           | 39              | 17                | 22                |
| CP_Qm        | AP_T1          | 49    | 54    | 73           | 43              | 19                | 24                |
| CP_Qm        | ZRANK2         | 49    | 68    | 78           | 39              | 10                | 29                |
| CP_Qm        | PISA           | 49    | 55    | 73           | 42              | 18                | 24                |
| CP_Qm        | AP_T2          | 49    | 56    | 74           | 43              | 18                | 25                |
| CP_Qm        | PYDOCK_TOT     | 49    | 54    | 71           | 39              | 17                | 22                |
| CP_Qm        | FIREDOCK_AB    | 49    | 47    | 72           | 48              | 25                | 23                |
| CP_Qm        | FIREDOCK       | 49    | 50    | 74           | 49              | 24                | 25                |
| CP_Qm        | CP_SKOIP       | 49    | 56    | 73           | 41              | 17                | 24                |
| CP_Qm        | CP_BFKV        | 49    | 54    | 64           | 25              | 10                | 15                |
| CP_Qm        | FIREDOCK_EI    | 49    | 47    | 71           | 46              | 24                | 22                |
| CP_Qm        | CP_DECK        | 49    | 55    | 72           | 40              | 17                | 23                |
| CP_Qm        | AP_OPUS_PSP    | 49    | 60    | 73           | 37              | 13                | 24                |
| CP_Qm        | ZRANK          | 49    | 43    | 69           | 46              | 26                | 20                |
| CP_Qm        | CP_BT          | 49    | 46    | 64           | 33              | 18                | 15                |
| CP_Qm        | CP_TSC         | 49    | 58    | 76           | 45              | 18                | 27                |
| CP_Qm        | CP_RMFCFA      | 49    | 40    | 66           | 43              | 26                | 17                |
| CP_Qm        | CP_TEI         | 49    | 50    | 67           | 35              | 17                | 18                |
| CP_Qm        | CP_TD          | 49    | 49    | 66           | 34              | 17                | 17                |
| CP_Qm        | CP_MJ3h        | 49    | 60    | 70           | 31              | 10                | 21                |
| CP_Qm        | AP_DARS        | 49    | 49    | 70           | 42              | 21                | 21                |
| CP_Qm        | CP_SKOb        | 49    | 51    | 64           | 28              | 13                | 15                |
| CP_Qm        | CP_TB          | 49    | 50    | 66           | 33              | 16                | 17                |
| CP_Qm        | SPIDER         | 49    | 41    | 74           | 58              | 33                | 25                |
| CP_Qm        | SIPPER         | 49    | 56    | 70           | 35              | 14                | 21                |
| CP_Qm        | AP_DCOMPLEX    | 49    | 37    | 68           | 50              | 31                | 19                |
| CP_Qm        | CP_Qp          | 49    | 49    | 65           | 32              | 16                | 16                |
| CP_Qm        | CP_HLPL        | 49    | 52    | 67           | 33              | 15                | 18                |
| CP_Qm        | CHARMM_ELE     | 49    | 39    | 70           | 52              | 31                | 21                |
| CP_Qm        | CP_MIXRANK_MIN | 49    | 42    | 63           | 35              | 21                | 14                |
| CP_Qm        | CP_ES3DC_MIN   | 49    | 50    | 65           | 31              | 15                | 16                |
| CP_Qm        | CP_ZS3DC_MIN   | 49    | 48    | 64           | 31              | 16                | 15                |
| CP_Qm        | AP_dDFIRE      | 49    | 33    | 67           | 52              | 34                | 18                |
| CP_Qm        | CP_SKOa        | 49    | 52    | 59           | 17              | 7                 | 10                |
| CP_Qm        | CHARMM_TOT     | 49    | 49    | 69           | 40              | 20                | 20                |
| CP_Qm        | ROSETTADOCK    | 49    | 41    | 71           | 52              | 30                | 22                |
| CP_Qm        | ATTRACT        | 49    | 38    | 66           | 45              | 28                | 17                |
| CP_Qm        | PROP NSTS      | 49    | 51    | 63           | 26              | 12                | 14                |
| CP_Qm        | DESOLV         | 49    | 46    | 63           | 31              | 17                | 14                |
| AP_GEOMETRIC | AP_T1          | 37    | 54    | 59           | 27              | 5                 | 22                |
| AP_GEOMETRIC | ZRANK2         | 37    | 68    | 69           | 33              | 1                 | 32                |

Table continued on next page

Table continued from previous page

| Method A     | Method B            | $ A $ | $ B $ | $ A \cup B $ | $ A \ominus B $ | $ A \setminus B $ | $ B \setminus A $ |
|--------------|---------------------|-------|-------|--------------|-----------------|-------------------|-------------------|
| AP_GEOMETRIC | PISA                | 37    | 55    | 62           | 32              | 7                 | 25                |
| AP_GEOMETRIC | AP_T2               | 37    | 56    | 62           | 31              | 6                 | 25                |
| AP_GEOMETRIC | PYDOCK_TOT          | 37    | 54    | 66           | 41              | 12                | 29                |
| AP_GEOMETRIC | FIREDOCK_AB         | 37    | 47    | 57           | 30              | 10                | 20                |
| AP_GEOMETRIC | FIREDOCK            | 37    | 50    | 61           | 35              | 11                | 24                |
| AP_GEOMETRIC | CP_SKOIP            | 37    | 56    | 67           | 41              | 11                | 30                |
| AP_GEOMETRIC | CP_BFKV             | 37    | 54    | 68           | 45              | 14                | 31                |
| AP_GEOMETRIC | FIREDOCK_EI         | 37    | 47    | 60           | 36              | 13                | 23                |
| AP_GEOMETRIC | CP_DECK             | 37    | 55    | 63           | 34              | 8                 | 26                |
| AP_GEOMETRIC | AP_OPUS_PSP         | 37    | 60    | 63           | 29              | 3                 | 26                |
| AP_GEOMETRIC | ZRANK               | 37    | 43    | 52           | 24              | 9                 | 15                |
| AP_GEOMETRIC | CP_BT               | 37    | 46    | 57           | 31              | 11                | 20                |
| AP_GEOMETRIC | CP_TSC              | 37    | 58    | 62           | 29              | 4                 | 25                |
| AP_GEOMETRIC | CP_RMFCFA           | 37    | 40    | 50           | 23              | 10                | 13                |
| AP_GEOMETRIC | CP_TEI              | 37    | 50    | 63           | 39              | 13                | 26                |
| AP_GEOMETRIC | CP_TD               | 37    | 49    | 60           | 34              | 11                | 23                |
| AP_GEOMETRIC | CP_MJ3h             | 37    | 60    | 68           | 39              | 8                 | 31                |
| AP_GEOMETRIC | AP_DARS             | 37    | 49    | 67           | 48              | 18                | 30                |
| AP_GEOMETRIC | CP_SKO <sub>b</sub> | 37    | 51    | 66           | 44              | 15                | 29                |
| AP_GEOMETRIC | CP_TB               | 37    | 50    | 59           | 31              | 9                 | 22                |
| AP_GEOMETRIC | SPIDER              | 37    | 41    | 55           | 32              | 14                | 18                |
| AP_GEOMETRIC | SIPPER              | 37    | 56    | 67           | 41              | 11                | 30                |
| AP_GEOMETRIC | AP_DCOMPLEX         | 37    | 37    | 45           | 16              | 8                 | 8                 |
| AP_GEOMETRIC | CP_Q <sub>p</sub>   | 37    | 49    | 57           | 28              | 8                 | 20                |
| AP_GEOMETRIC | CP_HLPL             | 37    | 52    | 58           | 27              | 6                 | 21                |
| AP_GEOMETRIC | CHARMM_ELE          | 37    | 39    | 60           | 44              | 21                | 23                |
| AP_GEOMETRIC | CP_MIXRANK_MIN      | 37    | 42    | 58           | 37              | 16                | 21                |
| AP_GEOMETRIC | CP_ES3DC_MIN        | 37    | 50    | 65           | 43              | 15                | 28                |
| AP_GEOMETRIC | CP_ZS3DC_MIN        | 37    | 48    | 62           | 39              | 14                | 25                |
| AP_GEOMETRIC | AP_dFIRE            | 37    | 33    | 44           | 18              | 11                | 7                 |
| AP_GEOMETRIC | CP_SKO <sub>a</sub> | 37    | 52    | 69           | 49              | 17                | 32                |
| AP_GEOMETRIC | CHARMM_TOT          | 37    | 49    | 62           | 38              | 13                | 25                |
| AP_GEOMETRIC | ROSETTADOCK         | 37    | 41    | 50           | 22              | 9                 | 13                |
| AP_GEOMETRIC | ATTRACT             | 37    | 38    | 48           | 21              | 10                | 11                |
| AP_GEOMETRIC | PROPST              | 37    | 51    | 70           | 52              | 19                | 33                |
| AP_GEOMETRIC | DESOLV              | 37    | 46    | 63           | 43              | 17                | 26                |
| AP_GEOMETRIC | CP_Q <sub>m</sub>   | 37    | 49    | 66           | 46              | 17                | 29                |
| CP_SJKG      | AP_T1               | 51    | 54    | 75           | 45              | 21                | 24                |
| CP_SJKG      | ZRANK2              | 51    | 68    | 78           | 37              | 10                | 27                |
| CP_SJKG      | PISA                | 51    | 55    | 72           | 38              | 17                | 21                |
| CP_SJKG      | AP_T2               | 51    | 56    | 74           | 41              | 18                | 23                |
| CP_SJKG      | PYDOCK_TOT          | 51    | 54    | 71           | 37              | 17                | 20                |
| CP_SJKG      | FIREDOCK_AB         | 51    | 47    | 72           | 46              | 25                | 21                |
| CP_SJKG      | FIREDOCK            | 51    | 50    | 73           | 45              | 23                | 22                |
| CP_SJKG      | CP_SKOIP            | 51    | 56    | 71           | 35              | 15                | 20                |
| CP_SJKG      | CP_BFKV             | 51    | 54    | 65           | 25              | 11                | 14                |
| CP_SJKG      | FIREDOCK_EI         | 51    | 47    | 72           | 46              | 25                | 21                |
| CP_SJKG      | CP_DECK             | 51    | 55    | 71           | 36              | 16                | 20                |
| CP_SJKG      | AP_OPUS_PSP         | 51    | 60    | 74           | 37              | 14                | 23                |
| CP_SJKG      | ZRANK               | 51    | 43    | 73           | 52              | 30                | 22                |
| CP_SJKG      | CP_BT               | 51    | 46    | 65           | 33              | 19                | 14                |
| CP_SJKG      | CP_TSC              | 51    | 58    | 78           | 47              | 20                | 27                |
| CP_SJKG      | CP_RMFCFA           | 51    | 40    | 68           | 45              | 28                | 17                |
| CP_SJKG      | CP_TEI              | 51    | 50    | 70           | 39              | 20                | 19                |
| CP_SJKG      | CP_TD               | 51    | 49    | 66           | 32              | 17                | 15                |
| CP_SJKG      | CP_MJ3h             | 51    | 60    | 70           | 29              | 10                | 19                |
| CP_SJKG      | AP_DARS             | 51    | 49    | 66           | 32              | 17                | 15                |
| CP_SJKG      | CP_SKO <sub>b</sub> | 51    | 51    | 61           | 20              | 10                | 10                |
| CP_SJKG      | CP_TB               | 51    | 50    | 68           | 35              | 18                | 17                |
| CP_SJKG      | SPIDER              | 51    | 41    | 72           | 52              | 31                | 21                |
| CP_SJKG      | SIPPER              | 51    | 56    | 70           | 33              | 14                | 19                |
| CP_SJKG      | AP_DCOMPLEX         | 51    | 37    | 71           | 54              | 34                | 20                |
| CP_SJKG      | CP_Q <sub>p</sub>   | 51    | 49    | 67           | 34              | 18                | 16                |
| CP_SJKG      | CP_HLPL             | 51    | 52    | 69           | 35              | 17                | 18                |
| CP_SJKG      | CHARMM_ELE          | 51    | 39    | 71           | 52              | 32                | 20                |
| CP_SJKG      | CP_MIXRANK_MIN      | 51    | 42    | 63           | 33              | 21                | 12                |
| CP_SJKG      | CP_ES3DC_MIN        | 51    | 50    | 66           | 31              | 16                | 15                |
| CP_SJKG      | CP_ZS3DC_MIN        | 51    | 48    | 65           | 31              | 17                | 14                |

Table continued on next page



Table continued from previous page

| Method A | Method B       | $ A $ | $ B $ | $ A \cup B $ | $ A \ominus B $ | $ A \setminus B $ | $ B \setminus A $ |
|----------|----------------|-------|-------|--------------|-----------------|-------------------|-------------------|
| CP_SJKG  | AP_dDFIRE      | 51    | 33    | 67           | 50              | 34                | 16                |
| CP_SJKG  | CP_SKOa        | 51    | 52    | 58           | 13              | 6                 | 7                 |
| CP_SJKG  | CHARMM_TOT     | 51    | 49    | 70           | 40              | 21                | 19                |
| CP_SJKG  | ROSETTADOCK    | 51    | 41    | 72           | 52              | 31                | 21                |
| CP_SJKG  | ATTRACT        | 51    | 38    | 69           | 49              | 31                | 18                |
| CP_SJKG  | PROPSTNS       | 51    | 51    | 64           | 26              | 13                | 13                |
| CP_SJKG  | DESOLV         | 51    | 46    | 62           | 27              | 16                | 11                |
| CP_SJKG  | CP_Qm          | 51    | 49    | 58           | 16              | 9                 | 7                 |
| CP_SJKG  | AP_GEOMETRIC   | 51    | 37    | 69           | 50              | 32                | 18                |
| CP_Qa    | AP_T1          | 44    | 54    | 71           | 44              | 17                | 27                |
| CP_Qa    | ZRANK2         | 44    | 68    | 77           | 42              | 9                 | 33                |
| CP_Qa    | PISA           | 44    | 55    | 71           | 43              | 16                | 27                |
| CP_Qa    | AP_T2          | 44    | 56    | 74           | 48              | 18                | 30                |
| CP_Qa    | PYDOCK_TOT     | 44    | 54    | 69           | 40              | 15                | 25                |
| CP_Qa    | FIREDOCK_AB    | 44    | 47    | 73           | 55              | 26                | 29                |
| CP_Qa    | FIREDOCK       | 44    | 50    | 73           | 52              | 23                | 29                |
| CP_Qa    | CP_SKOIP       | 44    | 56    | 69           | 38              | 13                | 25                |
| CP_Qa    | CP_BFKV        | 44    | 54    | 66           | 34              | 12                | 22                |
| CP_Qa    | FIREDOCK_EI    | 44    | 47    | 68           | 45              | 21                | 24                |
| CP_Qa    | CP_DECK        | 44    | 55    | 67           | 35              | 12                | 23                |
| CP_Qa    | AP_OPUS_PSP    | 44    | 60    | 74           | 44              | 14                | 30                |
| CP_Qa    | ZRANK          | 44    | 43    | 69           | 51              | 26                | 25                |
| CP_Qa    | CP_BT          | 44    | 46    | 65           | 40              | 19                | 21                |
| CP_Qa    | CP_TSC         | 44    | 58    | 76           | 50              | 18                | 32                |
| CP_Qa    | CP_RMFCa       | 44    | 40    | 65           | 46              | 25                | 21                |
| CP_Qa    | CP_TEl         | 44    | 50    | 65           | 36              | 15                | 21                |
| CP_Qa    | CP_TD          | 44    | 49    | 65           | 37              | 16                | 21                |
| CP_Qa    | CP_MJ3h        | 44    | 60    | 68           | 32              | 8                 | 24                |
| CP_Qa    | AP_DARS        | 44    | 49    | 65           | 37              | 16                | 21                |
| CP_Qa    | CP_SKOb        | 44    | 51    | 65           | 35              | 14                | 21                |
| CP_Qa    | CP_TB          | 44    | 50    | 65           | 36              | 15                | 21                |
| CP_Qa    | SPIDER         | 44    | 41    | 70           | 55              | 29                | 26                |
| CP_Qa    | SIPPER         | 44    | 56    | 71           | 42              | 15                | 27                |
| CP_Qa    | AP_DCOMPLEX    | 44    | 37    | 67           | 53              | 30                | 23                |
| CP_Qa    | CP_Qp          | 44    | 49    | 66           | 39              | 17                | 22                |
| CP_Qa    | CP_HLPL        | 44    | 52    | 68           | 40              | 16                | 24                |
| CP_Qa    | CHARMM_ELE     | 44    | 39    | 67           | 51              | 28                | 23                |
| CP_Qa    | CP_MIXRANK_MIN | 44    | 42    | 62           | 38              | 20                | 18                |
| CP_Qa    | CP_ES3DC_MIN   | 44    | 50    | 66           | 38              | 16                | 22                |
| CP_Qa    | CP_ZS3DC_MIN   | 44    | 48    | 64           | 36              | 16                | 20                |
| CP_Qa    | AP_dDFIRE      | 44    | 33    | 65           | 53              | 32                | 21                |
| CP_Qa    | CP_SKOa        | 44    | 52    | 62           | 28              | 10                | 18                |
| CP_Qa    | CHARMM_TOT     | 44    | 49    | 66           | 39              | 17                | 22                |
| CP_Qa    | ROSETTADOCK    | 44    | 41    | 68           | 51              | 27                | 24                |
| CP_Qa    | ATTRACT        | 44    | 38    | 67           | 52              | 29                | 23                |
| CP_Qa    | PROPSTNS       | 44    | 51    | 62           | 29              | 11                | 18                |
| CP_Qa    | DESOLV         | 44    | 46    | 60           | 30              | 14                | 16                |
| CP_Qa    | CP_Qm          | 44    | 49    | 53           | 13              | 4                 | 9                 |
| CP_Qa    | AP_GEOMETRIC   | 44    | 37    | 65           | 49              | 28                | 21                |
| CP_Qa    | CP_SJKG        | 44    | 51    | 59           | 23              | 8                 | 15                |
| CG_ENV   | AP_T1          | 42    | 54    | 69           | 42              | 15                | 27                |
| CG_ENV   | ZRANK2         | 42    | 68    | 80           | 50              | 12                | 38                |
| CG_ENV   | PISA           | 42    | 55    | 73           | 49              | 18                | 31                |
| CG_ENV   | AP_T2          | 42    | 56    | 70           | 42              | 14                | 28                |
| CG_ENV   | PYDOCK_TOT     | 42    | 54    | 68           | 40              | 14                | 26                |
| CG_ENV   | FIREDOCK_AB    | 42    | 47    | 68           | 47              | 21                | 26                |
| CG_ENV   | FIREDOCK       | 42    | 50    | 67           | 42              | 17                | 25                |
| CG_ENV   | CP_SKOIP       | 42    | 56    | 65           | 32              | 9                 | 23                |
| CG_ENV   | CP_BFKV        | 42    | 54    | 70           | 44              | 16                | 28                |
| CG_ENV   | FIREDOCK_EI    | 42    | 47    | 64           | 39              | 17                | 22                |
| CG_ENV   | CP_DECK        | 42    | 55    | 67           | 37              | 12                | 25                |
| CG_ENV   | AP_OPUS_PSP    | 42    | 60    | 75           | 48              | 15                | 33                |
| CG_ENV   | ZRANK          | 42    | 43    | 67           | 49              | 24                | 25                |
| CG_ENV   | CP_BT          | 42    | 46    | 65           | 42              | 19                | 23                |
| CG_ENV   | CP_TSC         | 42    | 58    | 73           | 46              | 15                | 31                |
| CG_ENV   | CP_RMFCa       | 42    | 40    | 61           | 40              | 21                | 19                |
| CG_ENV   | CP_TEl         | 42    | 50    | 65           | 38              | 15                | 23                |
| CG_ENV   | CP_TD          | 42    | 49    | 63           | 35              | 14                | 21                |

Table continued on next page

Table continued from previous page

| Method A    | Method B       | $ A $ | $ B $ | $ A \cup B $ | $ A \ominus B $ | $ A \setminus B $ | $ B \setminus A $ |
|-------------|----------------|-------|-------|--------------|-----------------|-------------------|-------------------|
| CG_ENV      | CP_MJ3h        | 42    | 60    | 68           | 34              | 8                 | 26                |
| CG_ENV      | AP_DARS        | 42    | 49    | 59           | 27              | 10                | 17                |
| CG_ENV      | CP_SKOb        | 42    | 51    | 68           | 43              | 17                | 26                |
| CG_ENV      | CP_TB          | 42    | 50    | 67           | 42              | 17                | 25                |
| CG_ENV      | SPIDER         | 42    | 41    | 64           | 45              | 23                | 22                |
| CG_ENV      | SIPPER         | 42    | 56    | 73           | 48              | 17                | 31                |
| CG_ENV      | AP_DCOMPLEX    | 42    | 37    | 63           | 47              | 26                | 21                |
| CG_ENV      | CP_Qp          | 42    | 49    | 69           | 47              | 20                | 27                |
| CG_ENV      | CP_HLPL        | 42    | 52    | 70           | 46              | 18                | 28                |
| CG_ENV      | CHARMM_ELE     | 42    | 39    | 67           | 53              | 28                | 25                |
| CG_ENV      | CP_MIXRANK_MIN | 42    | 42    | 64           | 44              | 22                | 22                |
| CG_ENV      | CP_ES3DC_MIN   | 42    | 50    | 74           | 56              | 24                | 32                |
| CG_ENV      | CP_ZS3DC_MIN   | 42    | 48    | 71           | 52              | 23                | 29                |
| CG_ENV      | AP_dDFIRE      | 42    | 33    | 58           | 41              | 25                | 16                |
| CG_ENV      | CP_SKOa        | 42    | 52    | 70           | 46              | 18                | 28                |
| CG_ENV      | CHARMM_TOT     | 42    | 49    | 63           | 35              | 14                | 21                |
| CG_ENV      | ROSETTADOCK    | 42    | 41    | 63           | 43              | 22                | 21                |
| CG_ENV      | ATTRACT        | 42    | 38    | 65           | 50              | 27                | 23                |
| CG_ENV      | PROP NSTS      | 42    | 51    | 69           | 45              | 18                | 27                |
| CG_ENV      | DESOLV         | 42    | 46    | 59           | 30              | 13                | 17                |
| CG_ENV      | CP_Qm          | 42    | 49    | 66           | 41              | 17                | 24                |
| CG_ENV      | AP_GEOMETRIC   | 42    | 37    | 63           | 47              | 26                | 21                |
| CG_ENV      | CP_SJKG        | 42    | 51    | 66           | 39              | 15                | 24                |
| CG_ENV      | CP_Qa          | 42    | 44    | 59           | 32              | 15                | 17                |
| CP_TEs      | AP_T1          | 41    | 54    | 64           | 33              | 10                | 23                |
| CP_TEs      | ZRANK2         | 41    | 68    | 73           | 37              | 5                 | 32                |
| CP_TEs      | PISA           | 41    | 55    | 66           | 36              | 11                | 25                |
| CP_TEs      | AP_T2          | 41    | 56    | 68           | 39              | 12                | 27                |
| CP_TEs      | PYDOCK_TOT     | 41    | 54    | 66           | 37              | 12                | 25                |
| CP_TEs      | FIREDOCK_AB    | 41    | 47    | 66           | 44              | 19                | 25                |
| CP_TEs      | FIREDOCK       | 41    | 50    | 66           | 41              | 16                | 25                |
| CP_TEs      | CP_SKOIP       | 41    | 56    | 66           | 35              | 10                | 25                |
| CP_TEs      | CP_BFKV        | 41    | 54    | 65           | 35              | 11                | 24                |
| CP_TEs      | FIREDOCK_EI    | 41    | 47    | 63           | 38              | 16                | 22                |
| CP_TEs      | CP_DECK        | 41    | 55    | 63           | 30              | 8                 | 22                |
| CP_TEs      | AP_OPUS_PSP    | 41    | 60    | 68           | 35              | 8                 | 27                |
| CP_TEs      | ZRANK          | 41    | 43    | 61           | 38              | 18                | 20                |
| CP_TEs      | CP_BT          | 41    | 46    | 62           | 37              | 16                | 21                |
| CP_TEs      | CP_TSC         | 41    | 58    | 70           | 41              | 12                | 29                |
| CP_TEs      | CP_RMFCFA      | 41    | 40    | 58           | 35              | 18                | 17                |
| CP_TEs      | CP_TEI         | 41    | 50    | 59           | 27              | 9                 | 18                |
| CP_TEs      | CP_TD          | 41    | 49    | 59           | 28              | 10                | 18                |
| CP_TEs      | CP_MJ3h        | 41    | 60    | 65           | 29              | 5                 | 24                |
| CP_TEs      | AP_DARS        | 41    | 49    | 67           | 44              | 18                | 26                |
| CP_TEs      | CP_SKOb        | 41    | 51    | 63           | 34              | 12                | 22                |
| CP_TEs      | CP_TB          | 41    | 50    | 64           | 37              | 14                | 23                |
| CP_TEs      | SPIDER         | 41    | 41    | 64           | 46              | 23                | 23                |
| CP_TEs      | SIPPER         | 41    | 56    | 67           | 37              | 11                | 26                |
| CP_TEs      | AP_DCOMPLEX    | 41    | 37    | 60           | 42              | 23                | 19                |
| CP_TEs      | CP_Qp          | 41    | 49    | 62           | 34              | 13                | 21                |
| CP_TEs      | CP_HLPL        | 41    | 52    | 63           | 33              | 11                | 22                |
| CP_TEs      | CHARMM_ELE     | 41    | 39    | 60           | 40              | 21                | 19                |
| CP_TEs      | CP_MIXRANK_MIN | 41    | 42    | 56           | 29              | 14                | 15                |
| CP_TEs      | CP_ES3DC_MIN   | 41    | 50    | 63           | 35              | 13                | 22                |
| CP_TEs      | CP_ZS3DC_MIN   | 41    | 48    | 61           | 33              | 13                | 20                |
| CP_TEs      | AP_dDFIRE      | 41    | 33    | 56           | 38              | 23                | 15                |
| CP_TEs      | CP_SKOa        | 41    | 52    | 65           | 37              | 13                | 24                |
| CP_TEs      | CHARMM_TOT     | 41    | 49    | 68           | 46              | 19                | 27                |
| CP_TEs      | ROSETTADOCK    | 41    | 41    | 62           | 42              | 21                | 21                |
| CP_TEs      | ATTRACT        | 41    | 38    | 57           | 35              | 19                | 16                |
| CP_TEs      | PROP NSTS      | 41    | 51    | 63           | 34              | 12                | 22                |
| CP_TEs      | DESOLV         | 41    | 46    | 63           | 39              | 17                | 22                |
| CP_TEs      | CP_Qm          | 41    | 49    | 63           | 36              | 14                | 22                |
| CP_TEs      | AP_GEOMETRIC   | 41    | 37    | 58           | 38              | 21                | 17                |
| CP_TEs      | CP_SJKG        | 41    | 51    | 64           | 36              | 13                | 23                |
| CP_TEs      | CP_Qa          | 41    | 44    | 58           | 31              | 14                | 17                |
| CP_TEs      | CG_ENV         | 41    | 42    | 60           | 37              | 18                | 19                |
| AP_GOAP_ALL | AP_T1          | 40    | 54    | 69           | 44              | 15                | 29                |

Table continued on next page

Table continued from previous page

| Method A             | Method B            | $ A $ | $ B $ | $ A \cup B $ | $ A \ominus B $ | $ A \setminus B $ | $ B \setminus A $ |
|----------------------|---------------------|-------|-------|--------------|-----------------|-------------------|-------------------|
| AP_GOAP_ALL          | ZRANK2              | 40    | 68    | 76           | 44              | 8                 | 36                |
| AP_GOAP_ALL          | PISA                | 40    | 55    | 66           | 37              | 11                | 26                |
| AP_GOAP_ALL          | AP_T2               | 40    | 56    | 66           | 36              | 10                | 26                |
| AP_GOAP_ALL          | PYDOCK_TOT          | 40    | 54    | 68           | 42              | 14                | 28                |
| AP_GOAP_ALL          | FIREDOCK_AB         | 40    | 47    | 66           | 45              | 19                | 26                |
| AP_GOAP_ALL          | FIREDOCK            | 40    | 50    | 66           | 42              | 16                | 26                |
| AP_GOAP_ALL          | CP_SKOIP            | 40    | 56    | 67           | 38              | 11                | 27                |
| AP_GOAP_ALL          | CP_BFKV             | 40    | 54    | 70           | 46              | 16                | 30                |
| AP_GOAP_ALL          | FIREDOCK_EI         | 40    | 47    | 63           | 39              | 16                | 23                |
| AP_GOAP_ALL          | CP_DECK             | 40    | 55    | 67           | 39              | 12                | 27                |
| AP_GOAP_ALL          | AP_OPUS_PSP         | 40    | 60    | 69           | 38              | 9                 | 29                |
| AP_GOAP_ALL          | ZRANK               | 40    | 43    | 65           | 47              | 22                | 25                |
| AP_GOAP_ALL          | CP_BT               | 40    | 46    | 62           | 38              | 16                | 22                |
| AP_GOAP_ALL          | CP_TSC              | 40    | 58    | 71           | 44              | 13                | 31                |
| AP_GOAP_ALL          | CP_RMFCFA           | 40    | 40    | 59           | 38              | 19                | 19                |
| AP_GOAP_ALL          | CP_TEI              | 40    | 50    | 64           | 38              | 14                | 24                |
| AP_GOAP_ALL          | CP_TD               | 40    | 49    | 62           | 35              | 13                | 22                |
| AP_GOAP_ALL          | CP_MJ3h             | 40    | 60    | 68           | 36              | 8                 | 28                |
| AP_GOAP_ALL          | AP_DARS             | 40    | 49    | 58           | 27              | 9                 | 18                |
| AP_GOAP_ALL          | CP_SKO <sub>b</sub> | 40    | 51    | 66           | 41              | 15                | 26                |
| AP_GOAP_ALL          | CP_TB               | 40    | 50    | 67           | 44              | 17                | 27                |
| AP_GOAP_ALL          | SPIDER              | 40    | 41    | 60           | 39              | 19                | 20                |
| AP_GOAP_ALL          | SIPPER              | 40    | 56    | 69           | 42              | 13                | 29                |
| AP_GOAP_ALL          | AP_DCOMPLEX         | 40    | 37    | 61           | 45              | 24                | 21                |
| AP_GOAP_ALL          | CP_Q <sub>p</sub>   | 40    | 49    | 67           | 45              | 18                | 27                |
| AP_GOAP_ALL          | CP_HLPL             | 40    | 52    | 67           | 42              | 15                | 27                |
| AP_GOAP_ALL          | CHARMM_ELE          | 40    | 39    | 66           | 53              | 27                | 26                |
| AP_GOAP_ALL          | CP_MIXRANK_MIN      | 40    | 42    | 65           | 48              | 23                | 25                |
| AP_GOAP_ALL          | CP_ES3DC_MIN        | 40    | 50    | 71           | 52              | 21                | 31                |
| AP_GOAP_ALL          | CP_ZS3DC_MIN        | 40    | 48    | 70           | 52              | 22                | 30                |
| AP_GOAP_ALL          | AP_dDFIRE           | 40    | 33    | 56           | 39              | 23                | 16                |
| AP_GOAP_ALL          | CP_SKO <sub>a</sub> | 40    | 52    | 65           | 38              | 13                | 25                |
| AP_GOAP_ALL          | CHARMM_TOT          | 40    | 49    | 65           | 41              | 16                | 25                |
| AP_GOAP_ALL          | ROSETTADOCK         | 40    | 41    | 61           | 41              | 20                | 21                |
| AP_GOAP_ALL          | ATTRACT             | 40    | 38    | 62           | 46              | 24                | 22                |
| AP_GOAP_ALL          | PROP NSTS           | 40    | 51    | 68           | 45              | 17                | 28                |
| AP_GOAP_ALL          | DESOLV              | 40    | 46    | 57           | 28              | 11                | 17                |
| AP_GOAP_ALL          | CP_Q <sub>m</sub>   | 40    | 49    | 65           | 41              | 16                | 25                |
| AP_GOAP_ALL          | AP_GEOMETRIC        | 40    | 37    | 61           | 45              | 24                | 21                |
| AP_GOAP_ALL          | CP_SJKG             | 40    | 51    | 63           | 35              | 12                | 23                |
| AP_GOAP_ALL          | CP_Q <sub>a</sub>   | 40    | 44    | 61           | 38              | 17                | 21                |
| AP_GOAP_ALL          | CG_ENV              | 40    | 42    | 55           | 28              | 13                | 15                |
| AP_GOAP_ALL          | CP_TEs              | 40    | 41    | 61           | 41              | 20                | 21                |
| AP_DD <sub>Gau</sub> | AP_T1               | 31    | 54    | 64           | 43              | 10                | 33                |
| AP_DD <sub>Gau</sub> | ZRANK2              | 31    | 68    | 71           | 43              | 3                 | 40                |
| AP_DD <sub>Gau</sub> | PISA                | 31    | 55    | 61           | 36              | 6                 | 30                |
| AP_DD <sub>Gau</sub> | AP_T2               | 31    | 56    | 65           | 43              | 9                 | 34                |
| AP_DD <sub>Gau</sub> | PYDOCK_TOT          | 31    | 54    | 66           | 47              | 12                | 35                |
| AP_DD <sub>Gau</sub> | FIREDOCK_AB         | 31    | 47    | 56           | 34              | 9                 | 25                |
| AP_DD <sub>Gau</sub> | FIREDOCK            | 31    | 50    | 61           | 41              | 11                | 30                |
| AP_DD <sub>Gau</sub> | CP_SKOIP            | 31    | 56    | 71           | 55              | 15                | 40                |
| AP_DD <sub>Gau</sub> | CP_BFKV             | 31    | 54    | 67           | 49              | 13                | 36                |
| AP_DD <sub>Gau</sub> | FIREDOCK_EI         | 31    | 47    | 60           | 42              | 13                | 29                |
| AP_DD <sub>Gau</sub> | CP_DECK             | 31    | 55    | 67           | 48              | 12                | 36                |
| AP_DD <sub>Gau</sub> | AP_OPUS_PSP         | 31    | 60    | 66           | 41              | 6                 | 35                |
| AP_DD <sub>Gau</sub> | ZRANK               | 31    | 43    | 53           | 32              | 10                | 22                |
| AP_DD <sub>Gau</sub> | CP_BT               | 31    | 46    | 60           | 43              | 14                | 29                |
| AP_DD <sub>Gau</sub> | CP_TSC              | 31    | 58    | 65           | 41              | 7                 | 34                |
| AP_DD <sub>Gau</sub> | CP_RMFCFA           | 31    | 40    | 52           | 33              | 12                | 21                |
| AP_DD <sub>Gau</sub> | CP_TEI              | 31    | 50    | 60           | 39              | 10                | 29                |
| AP_DD <sub>Gau</sub> | CP_TD               | 31    | 49    | 60           | 40              | 11                | 29                |
| AP_DD <sub>Gau</sub> | CP_MJ3h             | 31    | 60    | 69           | 47              | 9                 | 38                |
| AP_DD <sub>Gau</sub> | AP_DARS             | 31    | 49    | 67           | 54              | 18                | 36                |
| AP_DD <sub>Gau</sub> | CP_SKO <sub>b</sub> | 31    | 51    | 63           | 44              | 12                | 32                |
| AP_DD <sub>Gau</sub> | CP_TB               | 31    | 50    | 60           | 39              | 10                | 29                |
| AP_DD <sub>Gau</sub> | SPIDER              | 31    | 41    | 55           | 38              | 14                | 24                |
| AP_DD <sub>Gau</sub> | SIPPER              | 31    | 56    | 69           | 51              | 13                | 38                |
| AP_DD <sub>Gau</sub> | AP_DCOMPLEX         | 31    | 37    | 48           | 28              | 11                | 17                |

Table continued on next page

Table continued from previous page

| Method A | Method B       | $ A $ | $ B $ | $ A \cup B $ | $ A \ominus B $ | $ A \setminus B $ | $ B \setminus A $ |
|----------|----------------|-------|-------|--------------|-----------------|-------------------|-------------------|
| AP_DDGu  | CP_Qp          | 31    | 49    | 56           | 32              | 7                 | 25                |
| AP_DDGu  | CP_HLPL        | 31    | 52    | 60           | 37              | 8                 | 29                |
| AP_DDGu  | CHARMM_ELE     | 31    | 39    | 55           | 40              | 16                | 24                |
| AP_DDGu  | CP_MIXRANK_MIN | 31    | 42    | 61           | 49              | 19                | 30                |
| AP_DDGu  | CP_ES3DC_MIN   | 31    | 50    | 67           | 53              | 17                | 36                |
| AP_DDGu  | CP_ZS3DC_MIN   | 31    | 48    | 65           | 51              | 17                | 34                |
| AP_DDGu  | AP_dDFIRE      | 31    | 33    | 47           | 30              | 14                | 16                |
| AP_DDGu  | CP_SKOa        | 31    | 52    | 66           | 49              | 14                | 35                |
| AP_DDGu  | CHARMM_TOT     | 31    | 49    | 63           | 46              | 14                | 32                |
| AP_DDGu  | ROSETTADOCK    | 31    | 41    | 54           | 36              | 13                | 23                |
| AP_DDGu  | ATTRACT        | 31    | 38    | 49           | 29              | 11                | 18                |
| AP_DDGu  | PROP NSTS      | 31    | 51    | 66           | 50              | 15                | 35                |
| AP_DDGu  | DESOLV         | 31    | 46    | 64           | 51              | 18                | 33                |
| AP_DDGu  | CP_Qm          | 31    | 49    | 64           | 48              | 15                | 33                |
| AP_DDGu  | AP_GEOMETRIC   | 31    | 37    | 49           | 30              | 12                | 18                |
| AP_DDGu  | CP_SJKG        | 31    | 51    | 67           | 52              | 16                | 36                |
| AP_DDGu  | CP_Qa          | 31    | 44    | 63           | 51              | 19                | 32                |
| AP_DDGu  | CG_ENV         | 31    | 42    | 63           | 53              | 21                | 32                |
| AP_DDGu  | CP_TEs         | 31    | 41    | 56           | 40              | 15                | 25                |
| AP_DDGu  | AP_GOAP_ALL    | 31    | 40    | 60           | 49              | 20                | 29                |
| ODA      | AP_T1          | 33    | 54    | 63           | 39              | 9                 | 30                |
| ODA      | ZRANK2         | 33    | 68    | 74           | 47              | 6                 | 41                |
| ODA      | PISA           | 33    | 55    | 65           | 42              | 10                | 32                |
| ODA      | AP_T2          | 33    | 56    | 65           | 41              | 9                 | 32                |
| ODA      | PYDOCK_TOT     | 33    | 54    | 63           | 39              | 9                 | 30                |
| ODA      | FIREDOCK_AB    | 33    | 47    | 63           | 46              | 16                | 30                |
| ODA      | FIREDOCK       | 33    | 50    | 64           | 45              | 14                | 31                |
| ODA      | CP_SKOIP       | 33    | 56    | 66           | 43              | 10                | 33                |
| ODA      | CP_BFKV        | 33    | 54    | 70           | 53              | 16                | 37                |
| ODA      | FIREDOCK_EI    | 33    | 47    | 61           | 42              | 14                | 28                |
| ODA      | CP_DECK        | 33    | 55    | 65           | 42              | 10                | 32                |
| ODA      | AP_OPUS_PSP    | 33    | 60    | 65           | 37              | 5                 | 32                |
| ODA      | ZRANK          | 33    | 43    | 58           | 40              | 15                | 25                |
| ODA      | CP_BT          | 33    | 46    | 63           | 47              | 17                | 30                |
| ODA      | CP_TSC         | 33    | 58    | 66           | 41              | 8                 | 33                |
| ODA      | CP_RMFCA       | 33    | 40    | 54           | 35              | 14                | 21                |
| ODA      | CP_TEI         | 33    | 50    | 67           | 51              | 17                | 34                |
| ODA      | CP_TD          | 33    | 49    | 61           | 40              | 12                | 28                |
| ODA      | CP_MJ3h        | 33    | 60    | 70           | 47              | 10                | 37                |
| ODA      | AP_DARS        | 33    | 49    | 63           | 44              | 14                | 30                |
| ODA      | CP_SKOb        | 33    | 51    | 67           | 50              | 16                | 34                |
| ODA      | CP_TB          | 33    | 50    | 64           | 45              | 14                | 31                |
| ODA      | SPIDER         | 33    | 41    | 53           | 32              | 12                | 20                |
| ODA      | SIPPER         | 33    | 56    | 62           | 35              | 6                 | 29                |
| ODA      | AP_DCOMPLEX    | 33    | 37    | 51           | 32              | 14                | 18                |
| ODA      | CP_Qp          | 33    | 49    | 60           | 38              | 11                | 27                |
| ODA      | CP_HLPL        | 33    | 52    | 62           | 39              | 10                | 29                |
| ODA      | CHARMM_ELE     | 33    | 39    | 62           | 52              | 23                | 29                |
| ODA      | CP_MIXRANK_MIN | 33    | 42    | 58           | 41              | 16                | 25                |
| ODA      | CP_ES3DC_MIN   | 33    | 50    | 67           | 51              | 17                | 34                |
| ODA      | CP_ZS3DC_MIN   | 33    | 48    | 65           | 49              | 17                | 32                |
| ODA      | AP_dDFIRE      | 33    | 33    | 45           | 24              | 12                | 12                |
| ODA      | CP_SKOa        | 33    | 52    | 69           | 53              | 17                | 36                |
| ODA      | CHARMM_TOT     | 33    | 49    | 65           | 48              | 16                | 32                |
| ODA      | ROSETTADOCK    | 33    | 41    | 56           | 38              | 15                | 23                |
| ODA      | ATTRACT        | 33    | 38    | 51           | 31              | 13                | 18                |
| ODA      | PROP NSTS      | 33    | 51    | 70           | 56              | 19                | 37                |
| ODA      | DESOLV         | 33    | 46    | 57           | 35              | 11                | 24                |
| ODA      | CP_Qm          | 33    | 49    | 66           | 50              | 17                | 33                |
| ODA      | AP_GEOMETRIC   | 33    | 37    | 50           | 30              | 13                | 17                |
| ODA      | CP_SJKG        | 33    | 51    | 66           | 48              | 15                | 33                |
| ODA      | CP_Qa          | 33    | 44    | 63           | 49              | 19                | 30                |
| ODA      | CG_ENV         | 33    | 42    | 58           | 41              | 16                | 25                |
| ODA      | CP_TEs         | 33    | 41    | 56           | 38              | 15                | 23                |
| ODA      | AP_GOAP_ALL    | 33    | 40    | 54           | 35              | 14                | 21                |
| ODA      | AP_DDGu        | 33    | 31    | 53           | 42              | 22                | 20                |
| ELE      | AP_T1          | 39    | 54    | 64           | 35              | 10                | 25                |
| ELE      | ZRANK2         | 39    | 68    | 74           | 41              | 6                 | 35                |

Table continued on next page

Table continued from previous page

| Method A | Method B       | $ A $ | $ B $ | $ A \cup B $ | $ A \ominus B $ | $ A \setminus B $ | $ B \setminus A $ |
|----------|----------------|-------|-------|--------------|-----------------|-------------------|-------------------|
| ELE      | PISA           | 39    | 55    | 66           | 38              | 11                | 27                |
| ELE      | AP_T2          | 39    | 56    | 67           | 39              | 11                | 28                |
| ELE      | PYDOCK_TOT     | 39    | 54    | 62           | 31              | 8                 | 23                |
| ELE      | FIREDOCK_AB    | 39    | 47    | 58           | 30              | 11                | 19                |
| ELE      | FIREDOCK       | 39    | 50    | 61           | 33              | 11                | 22                |
| ELE      | CP_SKOIP       | 39    | 56    | 74           | 53              | 18                | 35                |
| ELE      | CP_BFKV        | 39    | 54    | 68           | 43              | 14                | 29                |
| ELE      | FIREDOCK_EI    | 39    | 47    | 62           | 38              | 15                | 23                |
| ELE      | CP_DECK        | 39    | 55    | 70           | 46              | 15                | 31                |
| ELE      | AP_OPUS_PSP    | 39    | 60    | 72           | 45              | 12                | 33                |
| ELE      | ZRANK          | 39    | 43    | 55           | 28              | 12                | 16                |
| ELE      | CP_BT          | 39    | 46    | 62           | 39              | 16                | 23                |
| ELE      | CP_TSC         | 39    | 58    | 70           | 43              | 12                | 31                |
| ELE      | CP_RMFCa       | 39    | 40    | 55           | 31              | 15                | 16                |
| ELE      | CP_TEI         | 39    | 50    | 64           | 39              | 14                | 25                |
| ELE      | CP_TD          | 39    | 49    | 63           | 38              | 14                | 24                |
| ELE      | CP_MJ3h        | 39    | 60    | 71           | 43              | 11                | 32                |
| ELE      | AP_DARS        | 39    | 49    | 68           | 48              | 19                | 29                |
| ELE      | CP_SKOb        | 39    | 51    | 66           | 42              | 15                | 27                |
| ELE      | CP_TB          | 39    | 50    | 61           | 33              | 11                | 22                |
| ELE      | SPIDER         | 39    | 41    | 58           | 36              | 17                | 19                |
| ELE      | SIPPER         | 39    | 56    | 70           | 45              | 14                | 31                |
| ELE      | AP_DCOMPLEX    | 39    | 37    | 54           | 32              | 17                | 15                |
| ELE      | CP_Qp          | 39    | 49    | 63           | 38              | 14                | 24                |
| ELE      | CP_HLPL        | 39    | 52    | 64           | 37              | 12                | 25                |
| ELE      | CHARMM_ELE     | 39    | 39    | 51           | 24              | 12                | 12                |
| ELE      | CP_MIXRANK_MIN | 39    | 42    | 62           | 43              | 20                | 23                |
| ELE      | CP_ES3DC_MIN   | 39    | 50    | 67           | 45              | 17                | 28                |
| ELE      | CP_ZS3DC_MIN   | 39    | 48    | 64           | 41              | 16                | 25                |
| ELE      | AP_dFIRE       | 39    | 33    | 51           | 30              | 18                | 12                |
| ELE      | CP_SKOa        | 39    | 52    | 69           | 47              | 17                | 30                |
| ELE      | CHARMM_TOT     | 39    | 49    | 66           | 44              | 17                | 27                |
| ELE      | ROSETTADOCK    | 39    | 41    | 58           | 36              | 17                | 19                |
| ELE      | ATTRACT        | 39    | 38    | 54           | 31              | 16                | 15                |
| ELE      | PROPSTs        | 39    | 51    | 69           | 48              | 18                | 30                |
| ELE      | DESOLV         | 39    | 46    | 64           | 43              | 18                | 25                |
| ELE      | CP_Qm          | 39    | 49    | 68           | 48              | 19                | 29                |
| ELE      | AP_GEOMETRIC   | 39    | 37    | 57           | 38              | 20                | 18                |
| ELE      | CP_SJKG        | 39    | 51    | 69           | 48              | 18                | 30                |
| ELE      | CP_Qa          | 39    | 44    | 66           | 49              | 22                | 27                |
| ELE      | CG_ENV         | 39    | 42    | 64           | 47              | 22                | 25                |
| ELE      | CP_TEs         | 39    | 41    | 59           | 38              | 18                | 20                |
| ELE      | AP_GOAP_ALL    | 39    | 40    | 63           | 47              | 23                | 24                |
| ELE      | AP_DDGu        | 39    | 31    | 51           | 32              | 20                | 12                |
| ELE      | ODA            | 39    | 33    | 58           | 44              | 25                | 19                |
| AP_MPS   | AP_T1          | 40    | 54    | 72           | 50              | 18                | 32                |
| AP_MPS   | ZRANK2         | 40    | 68    | 74           | 40              | 6                 | 34                |
| AP_MPS   | PISA           | 40    | 55    | 68           | 41              | 13                | 28                |
| AP_MPS   | AP_T2          | 40    | 56    | 72           | 48              | 16                | 32                |
| AP_MPS   | PYDOCK_TOT     | 40    | 54    | 73           | 52              | 19                | 33                |
| AP_MPS   | FIREDOCK_AB    | 40    | 47    | 67           | 47              | 20                | 27                |
| AP_MPS   | FIREDOCK       | 40    | 50    | 70           | 50              | 20                | 30                |
| AP_MPS   | CP_SKOIP       | 40    | 56    | 69           | 42              | 13                | 29                |
| AP_MPS   | CP_BFKV        | 40    | 54    | 67           | 40              | 13                | 27                |
| AP_MPS   | FIREDOCK_EI    | 40    | 47    | 71           | 55              | 24                | 31                |
| AP_MPS   | CP_DECK        | 40    | 55    | 70           | 45              | 15                | 30                |
| AP_MPS   | AP_OPUS_PSP    | 40    | 60    | 70           | 40              | 10                | 30                |
| AP_MPS   | ZRANK          | 40    | 43    | 64           | 45              | 21                | 24                |
| AP_MPS   | CP_BT          | 40    | 46    | 64           | 42              | 18                | 24                |
| AP_MPS   | CP_TSC         | 40    | 58    | 71           | 44              | 13                | 31                |
| AP_MPS   | CP_RMFCa       | 40    | 40    | 60           | 40              | 20                | 20                |
| AP_MPS   | CP_TEI         | 40    | 50    | 68           | 46              | 18                | 28                |
| AP_MPS   | CP_TD          | 40    | 49    | 65           | 41              | 16                | 25                |
| AP_MPS   | CP_MJ3h        | 40    | 60    | 75           | 50              | 15                | 35                |
| AP_MPS   | AP_DARS        | 40    | 49    | 68           | 47              | 19                | 28                |
| AP_MPS   | CP_SKOb        | 40    | 51    | 60           | 29              | 9                 | 20                |
| AP_MPS   | CP_TB          | 40    | 50    | 65           | 40              | 15                | 25                |
| AP_MPS   | SPIDER         | 40    | 41    | 67           | 53              | 26                | 27                |

Table continued on next page

Table continued from previous page

| Method A | Method B       | $ A $ | $ B $ | $ A \cup B $ | $ A \ominus B $ | $ A \setminus B $ | $ B \setminus A $ |
|----------|----------------|-------|-------|--------------|-----------------|-------------------|-------------------|
| AP_MPS   | SIPPER         | 40    | 56    | 68           | 40              | 12                | 28                |
| AP_MPS   | AP_DCOMPLEX    | 40    | 37    | 60           | 43              | 23                | 20                |
| AP_MPS   | CP_Qp          | 40    | 49    | 58           | 27              | 9                 | 18                |
| AP_MPS   | CP_HLPL        | 40    | 52    | 61           | 30              | 9                 | 21                |
| AP_MPS   | CHARMM_ELE     | 40    | 39    | 60           | 41              | 21                | 20                |
| AP_MPS   | CP_MIXRANK_MIN | 40    | 42    | 58           | 34              | 16                | 18                |
| AP_MPS   | CP_ES3DC_MIN   | 40    | 50    | 62           | 34              | 12                | 22                |
| AP_MPS   | CP_ZS3DC_MIN   | 40    | 48    | 61           | 34              | 13                | 21                |
| AP_MPS   | AP_dDFIRE      | 40    | 33    | 57           | 41              | 24                | 17                |
| AP_MPS   | CP_SKOa        | 40    | 52    | 62           | 32              | 10                | 22                |
| AP_MPS   | CHARMM_TOT     | 40    | 49    | 72           | 55              | 23                | 32                |
| AP_MPS   | ROSETTADOCK    | 40    | 41    | 64           | 47              | 23                | 24                |
| AP_MPS   | ATTRACT        | 40    | 38    | 61           | 44              | 23                | 21                |
| AP_MPS   | PROP NSTS      | 40    | 51    | 60           | 29              | 9                 | 20                |
| AP_MPS   | DESOLV         | 40    | 46    | 65           | 44              | 19                | 25                |
| AP_MPS   | CP_Qm          | 40    | 49    | 62           | 35              | 13                | 22                |
| AP_MPS   | AP_GEOMETRIC   | 40    | 37    | 60           | 43              | 23                | 20                |
| AP_MPS   | CP_SJKG        | 40    | 51    | 63           | 35              | 12                | 23                |
| AP_MPS   | CP_Qa          | 40    | 44    | 61           | 38              | 17                | 21                |
| AP_MPS   | CG_ENV         | 40    | 42    | 68           | 54              | 26                | 28                |
| AP_MPS   | CP_TEs         | 40    | 41    | 60           | 39              | 19                | 20                |
| AP_MPS   | AP_GOAP_ALL    | 40    | 40    | 67           | 54              | 27                | 27                |
| AP_MPS   | AP_DDgau       | 40    | 31    | 54           | 37              | 23                | 14                |
| AP_MPS   | ODA            | 40    | 33    | 61           | 49              | 28                | 21                |
| AP_MPS   | ELE            | 40    | 39    | 61           | 43              | 22                | 21                |
| AA_PROP  | AP_T1          | 32    | 54    | 68           | 50              | 14                | 36                |
| AA_PROP  | ZRANK2         | 32    | 68    | 79           | 58              | 11                | 47                |
| AA_PROP  | PISA           | 32    | 55    | 67           | 47              | 12                | 35                |
| AA_PROP  | AP_T2          | 32    | 56    | 69           | 50              | 13                | 37                |
| AA_PROP  | PYDOCK_TOT     | 32    | 54    | 67           | 48              | 13                | 35                |
| AA_PROP  | FIREDOCK_AB    | 32    | 47    | 62           | 45              | 15                | 30                |
| AA_PROP  | FIREDOCK       | 32    | 50    | 63           | 44              | 13                | 31                |
| AA_PROP  | CP_SKOIP       | 32    | 56    | 68           | 48              | 12                | 36                |
| AA_PROP  | CP_BFKV        | 32    | 54    | 70           | 54              | 16                | 38                |
| AA_PROP  | FIREDOCK_EI    | 32    | 47    | 60           | 41              | 13                | 28                |
| AA_PROP  | CP_DECK        | 32    | 55    | 68           | 49              | 13                | 36                |
| AA_PROP  | AP_OPUS_PSP    | 32    | 60    | 72           | 52              | 12                | 40                |
| AA_PROP  | ZRANK          | 32    | 43    | 58           | 41              | 15                | 26                |
| AA_PROP  | CP_BT          | 32    | 46    | 64           | 50              | 18                | 32                |
| AA_PROP  | CP_TSC         | 32    | 58    | 71           | 52              | 13                | 39                |
| AA_PROP  | CP_RMFCa       | 32    | 40    | 57           | 42              | 17                | 25                |
| AA_PROP  | CP_TEl         | 32    | 50    | 63           | 44              | 13                | 31                |
| AA_PROP  | CP_TD          | 32    | 49    | 64           | 47              | 15                | 32                |
| AA_PROP  | CP_MJ3h        | 32    | 60    | 68           | 44              | 8                 | 36                |
| AA_PROP  | AP_DARS        | 32    | 49    | 61           | 41              | 12                | 29                |
| AA_PROP  | CP_SKOb        | 32    | 51    | 69           | 55              | 18                | 37                |
| AA_PROP  | CP_TB          | 32    | 50    | 65           | 48              | 15                | 33                |
| AA_PROP  | SPIDER         | 32    | 41    | 56           | 39              | 15                | 24                |
| AA_PROP  | SIPPER         | 32    | 56    | 69           | 50              | 13                | 37                |
| AA_PROP  | AP_DCOMPLEX    | 32    | 37    | 55           | 41              | 18                | 23                |
| AA_PROP  | CP_Qp          | 32    | 49    | 63           | 45              | 14                | 31                |
| AA_PROP  | CP_HLPL        | 32    | 52    | 65           | 46              | 13                | 33                |
| AA_PROP  | CHARMM_ELE     | 32    | 39    | 63           | 55              | 24                | 31                |
| AA_PROP  | CP_MIXRANK_MIN | 32    | 42    | 60           | 46              | 18                | 28                |
| AA_PROP  | CP_ES3DC_MIN   | 32    | 50    | 65           | 48              | 15                | 33                |
| AA_PROP  | CP_ZS3DC_MIN   | 32    | 48    | 65           | 50              | 17                | 33                |
| AA_PROP  | AP_dDFIRE      | 32    | 33    | 52           | 39              | 19                | 20                |
| AA_PROP  | CP_SKOa        | 32    | 52    | 69           | 54              | 17                | 37                |
| AA_PROP  | CHARMM_TOT     | 32    | 49    | 63           | 45              | 14                | 31                |
| AA_PROP  | ROSETTADOCK    | 32    | 41    | 57           | 41              | 16                | 25                |
| AA_PROP  | ATTRACT        | 32    | 38    | 55           | 40              | 17                | 23                |
| AA_PROP  | PROP NSTS      | 32    | 51    | 70           | 57              | 19                | 38                |
| AA_PROP  | DESOLV         | 32    | 46    | 60           | 42              | 14                | 28                |
| AA_PROP  | CP_Qm          | 32    | 49    | 64           | 47              | 15                | 32                |
| AA_PROP  | AP_GEOMETRIC   | 32    | 37    | 56           | 43              | 19                | 24                |
| AA_PROP  | CP_SJKG        | 32    | 51    | 67           | 51              | 16                | 35                |
| AA_PROP  | CP_Qa          | 32    | 44    | 60           | 44              | 16                | 28                |
| AA_PROP  | CG_ENV         | 32    | 42    | 59           | 44              | 17                | 27                |

Table continued on next page

Table continued from previous page

| Method A | Method B    | $ A $ | $ B $ | $ A \cup B $ | $ A \ominus B $ | $ A \setminus B $ | $ B \setminus A $ |
|----------|-------------|-------|-------|--------------|-----------------|-------------------|-------------------|
| AA_PROP  | CP_TEs      | 32    | 41    | 58           | 43              | 17                | 26                |
| AA_PROP  | AP_GOAP_ALL | 32    | 40    | 57           | 42              | 17                | 25                |
| AA_PROP  | AP_DDgau    | 32    | 31    | 52           | 41              | 21                | 20                |
| AA_PROP  | ODA         | 32    | 33    | 54           | 43              | 21                | 22                |
| AA_PROP  | ELE         | 32    | 39    | 59           | 47              | 20                | 27                |
| AA_PROP  | AP_MPS      | 32    | 40    | 61           | 50              | 21                | 29                |
